# Supplementary material for: Comparative RNA-Sequencing Analysis Reveals High Complexity and Heterogeneity of Transcriptomic and Immune Profiles in Hepatocellular Carcinoma Tumors of Viral (HBV, HCV) and Non-Viral Etiology
Source: MDPI journal article supplement (doi:10.3390/medicina58121803), 2022-12-07
Supplement: s1 [file s1]

# Comparative RNA-sequencing analysis reveals high complexity and heterogeneity of transcriptomic and immune profiles in hepatocellular carcinoma tumors of viral (HBV, HCV) and non-viral etiology

## Supplementary data

### Contents

|                                                                                                                             |    |
|-----------------------------------------------------------------------------------------------------------------------------|----|
| Supplementary Table 1. Patients` features .....                                                                             | 2  |
| Supplementary Table 2. Primer sequences .....                                                                               | 3  |
| Supplementary Table 3. Data Common HBV & HCV .....                                                                          | 4  |
| Supplementary Table 4. Data Common HBV& nonBnonC .....                                                                      | 5  |
| Supplementary Table 5. Data Common HCV& nonBnonC .....                                                                      | 6  |
| Supplementary Table 6. List of up and down-regulated genes in HBV related HCC.....                                          | 8  |
| Supplementary Table 7. List of up and down-regulated genes in HCV related HCC.....                                          | 10 |
| Supplementary Table 8. List of up and down-regulated genes in non-viral HCC.....                                            | 19 |
| Supplementary Table 9. List of regulatory genes in HCV related group .....                                                  | 29 |
| Supplementary Table 10. List of regulatory genes in non-viral group .....                                                   | 30 |
| Supplementary Table 11. Clustering of immune gene data by ClueGO .....                                                      | 31 |
| Supplementary Figure 1. Histology (hematoxylin-eosin staining) for the HCC patients (non-viral, HBV and HCV etiology) ..... | 33 |
| Supplementary Figure 2. Tuxedo pipeline.....                                                                                | 34 |
| Supplementary Figure 3. HCV HUB and moonlighting genes enrichment .....                                                     | 35 |
| Supplementary Figure 4. nonBnonC HUB and moonlighting genes enrichment .....                                                | 44 |
| Supplementary Figure 5. Immunome analysis in tumor tissues versus non-tumoral tissues and in TCGA cohort .....              | 59 |

Supplementary Table 1. Patients` features

| Variables                                 | HBV group<br>(n=8)  | HCV group<br>(n=8)  | Non infection<br>group (n=8) | <i>P</i> -<br>Value |
|-------------------------------------------|---------------------|---------------------|------------------------------|---------------------|
| Age (mean $\pm$ SD)                       | 57 $\pm$ 13         | 64 $\pm$ 6          | 62 $\pm$ 9                   | 0.4251              |
| Gender (n, %)                             |                     |                     |                              |                     |
| Male % (n)                                | 62.5% (5)           | 37.5% (3)           | 75% (6)                      | 0.3012              |
| Female % (n)                              | 37.5% (3)           | 62.5% (5)           | 25% (2)                      |                     |
| Tumor size cm (mean $\pm$ SD)             | 3.1 $\pm$ 1.6       | 4.4 $\pm$ 2.4       | 5.9 $\pm$ 3.58               | 0.1257              |
| Macrovascular invasion                    |                     |                     |                              |                     |
| Yes                                       | 12.5 % (1)          | 25 % (2)            | 12.5 % (1)                   | 0.7408              |
| No                                        | 87.5 % (7)          | 75 % (6)            | 87.5 % (7)                   |                     |
| Microvascular invasion                    |                     |                     |                              |                     |
| Yes                                       | 0%                  | 25 % (2)            | 12.5 % (1)                   | 0.3189              |
| No                                        | 100% (8)            | 75 % (6)            | 87.5 % (7)                   |                     |
| Stages                                    |                     |                     |                              |                     |
| I % (n)                                   | 50 % (4)            | 50 % (4)            | 75 % (6)                     | 0.3964              |
| II % (n)                                  | 37.5 % (3)          | 37.5 % (3)          | 0% (0)                       |                     |
| III % (n)                                 | 12.5 % (1)          | 12.5 % (1)          | 25% (2)                      |                     |
| Overall Survival (months) (mean $\pm$ SD) | 37.63 $\pm$ (13.87) | 28.13 $\pm$ (19.34) | 30.88 $\pm$ (13.89)          | 0.5846              |
| PIVKA mAU/ml (mean $\pm$ SD)              | 925.4 $\pm$ 1419    | 6706 $\pm$ 8295     | 11980 $\pm$ 13042            | 0.0969              |
| Serum AFP (ng/ml) (mean $\pm$ SD)         | 198.6 $\pm$ 412.5   | 833.3 $\pm$ 812.1   | 134.5 $\pm$ 349.9            | <b>0.0451</b>       |

The *p* values are from the One-way ANOVA /Chi-square (and Fisher's exact) test; SD, standard deviation.

Supplementary Table 2. Primer sequences

| Oligo name        | Sequence                       |
|-------------------|--------------------------------|
| <i>COLEC10_F</i>  | ATA-GCC-GTC-CTA-CCG-CTG-AA     |
| <i>COLEC10_R</i>  | TGA-TCT-CCC-ATA-TCA-CCC-AGT-TC |
| <i>HGF_F</i>      | GCT-ATC-GGG-GTA-AAG-ACC-TAC-A  |
| <i>HGF_R</i>      | CGT-AGC-GTA-CCT-CTG-GAT-TGC    |
| <i>CLEC1B_F</i>   | GAC-AAC-CGG-AAC-ATT-GTG-GAG    |
| <i>CLEC1B_R</i>   | ACT-TCT-GGC-GAG-ATA-ATC-CGA    |
| <i>CYP17A1_F</i>  | TAT-GGC-CCC-ATC-TAT-TCG-GTT    |
| <i>CYP17A1_R</i>  | GCG-ATA-CCC-TTA-CGG-TTG-TTG    |
| <i>HSF1_F</i>     | CCA-TGA-AGC-ATG-AGA-ATG-AGG-C  |
| <i>HSF1_R</i>     | CTT-GTT-GAC-GAC-TTT-CTG-TTG-C  |
| <i>BIRC5_F</i>    | AGG-ACC-ACC-GCA-TCT-CTA-CAT    |
| <i>BIRC5_R</i>    | AAG-TCT-GGC-TCG-TTC-TCA-GTG    |
| <i>HSP90AB1_F</i> | AGA-AAT-TGC-CCA-ACT-CAT-GTC-C  |
| <i>HSP90AB1_R</i> | ATC-AAC-TCC-CGA-AGG-AAA-ATC-TC |
| <i>SLC22A1_F</i>  | TGT-CAC-CGA-AAA-GCT-GAG-CC     |
| <i>SLC22A1_R</i>  | TCC-GTG-AAC-CAC-AGG-TAC-ATC    |
| <i>HSPB1_F</i>    | ACG-GTC-AAG-ACC-AAG-GAT-GG     |
| <i>HSPB1_R</i>    | AGC-GTG-TAT-TTC-CGC-GTG-A      |
| <i>RNF187_F</i>   | GTG-ATG-GAC-CGT-AGG-AAG-AAG-G  |
| <i>RNF187_R</i>   | GTG-ACC-TGA-ACC-GCT-CAG-TG     |
| <i>FGFR4_F</i>    | GAG-GGG-CCG-CCT-AGA-GAT-T      |
| <i>FGFR4_R</i>    | CAG-GAC-GAT-CAT-GGA-GCC-T      |

Supplementary Table 3. Data Common HBV & HCV

| Crt. No.             | Differentially expressed genes (DEGs) | Tumor group etiology |                   |                                        |
|----------------------|---------------------------------------|----------------------|-------------------|----------------------------------------|
|                      |                                       | HBV log 2 (ratio)    | HCV log 2 (ratio) | Non viral (non-B, non-C) log 2 (ratio) |
| Up-regulated genes   |                                       |                      |                   |                                        |
| 1                    | MTNR1B                                | 6.2                  | 7.42              | 0                                      |
| 2                    | AFP                                   | 5.93                 | 5.02              | 0                                      |
| 3                    | COL7A1;                               | 5.43                 | 7.24              | 0                                      |
| 4                    | RGSL1                                 | 4.85                 | 3.72              | 0                                      |
| 5                    | PDE7B                                 | 4.83                 | 5.75              | 0                                      |
| 6                    | FMO2                                  | 4.25                 | 2.52              | 0                                      |
| 7                    | MDK                                   | 3.81                 | 3.27              | 0                                      |
| 8                    | EGF                                   | 3.8                  | 6.23              | 0                                      |
| 9                    | HAGLR                                 | 3.76                 | 4.26              | 0                                      |
| 10                   | LDB2                                  | 3.72                 | 4.57              | 0                                      |
| 11                   | EPS8L3                                | 3.63                 | 4.31              | 0                                      |
| 12                   | ANLN                                  | 3.53                 | 5.62              | 0                                      |
| 13                   | KIF18B                                | 3.48                 | 5.65              | 0                                      |
| 14                   | CDC25C                                | 3.4                  | 4.85              | 0                                      |
| 15                   | CENPF                                 | 3.37                 | 5.08              | 0                                      |
| 16                   | CPNE7                                 | 3.32                 | 3.14              | 0                                      |
| 17                   | DEPDC1                                | 3.31                 | 5.64              | 0                                      |
| 18                   | EXO1                                  | 3.18                 | 4.8               | 0                                      |
| 19                   | CYP7A1                                | 3.03                 | 3.12              | 0                                      |
| 20                   | MKI67                                 | 3.01                 | 4.59              | 0                                      |
| 21                   | CDK1                                  | 2.98                 | 4.35              | 0                                      |
| 22                   | CENPE                                 | 2.92                 | 3.77              | 0                                      |
| 23                   | HMMR                                  | 2.91                 | 3.92              | 0                                      |
| 24                   | C2orf48; RRM2                         | 2.84                 | 4.06              | 0                                      |
| 25                   | CCNB1                                 | 2.71                 | 3.99              | 0                                      |
| 26                   | KCCAT333;                             | 2.69                 | 1.92              | 0                                      |
| 27                   | PRC1                                  | 2.64                 | 3.61              | 0                                      |
| 28                   | TTC39A                                | 2.63                 | 3.37              | 0                                      |
| 29                   | SPP1                                  | 2.3                  | 3.69              | 0                                      |
| 30                   | ARFGEF3                               | 2.24                 | 2.61              | 0                                      |
| 31                   | GREB1                                 | 2.21                 | 1.84              | 0                                      |
| 32                   | NUSAP1                                | 2.21                 | 3.07              | 0                                      |
| 33                   | TPX2                                  | 2.15                 | 3.6               | 0                                      |
| 34                   | SNAP25-AS1                            | 1.93                 | 1.88              | 0                                      |
| 35                   | GDNF-AS1                              | 1.79                 | 2.43              | 0                                      |
| 36                   | DPY19L2P2                             | 1.78                 | 1.58              | 0                                      |
| Down-regulated genes |                                       |                      |                   |                                        |
| 1                    | MASP1                                 | -1.66                | -1.67             | 0                                      |
| 2                    | SERPINA11                             | -1.69                | -2.1              | 0                                      |
| 3                    | C8B                                   | -1.73                | -2.27             | 0                                      |
| 4                    | NRG1                                  | -1.76                | -1.89             | 0                                      |

|    |           |       |       |   |
|----|-----------|-------|-------|---|
| 5  | RCAN1     | -1.83 | -1.7  | 0 |
| 6  | FOS       | -1.86 | -2.25 | 0 |
| 7  | RND3      | -1.9  | -1.97 | 0 |
| 8  | WDR17     | -2    | -1.78 | 0 |
| 9  | NPR3      | -2.08 | -2.05 | 0 |
| 10 | OLFML3    | -2.26 | -1.87 | 0 |
| 11 | SEMA6D    | -2.31 | -2.57 | 0 |
| 12 | TNXB      | -2.31 | -1.96 | 0 |
| 13 | COL25A1   | -2.36 | -3.37 | 0 |
| 14 | IGFBP3    | -2.51 | -1.99 | 0 |
| 15 | STEAP4    | -2.56 | -2.72 | 0 |
| 16 | CXCL12    | -2.76 | -2.97 | 0 |
| 17 | PHACTR3   | -2.76 | -3.9  | 0 |
| 18 | ANKRD18DP | -3.07 | -3.23 | 0 |
| 19 | DNASE1L3  | -3.13 | -2.87 | 0 |
| 20 | HMGCLL1   | -3.27 | -4.07 | 0 |
| 21 | CD5L      | -3.41 | -2.16 | 0 |
| 22 | NDST3     | -3.96 | -4    | 0 |
| 23 | NOL4      | -4.35 | -3.21 | 0 |

Supplementary Table 4. Data Common HBV& nonBnonC

| Crt. No.             | Differentially expressed genes (DEGs) | Tumor group etiology |                   |                                        |
|----------------------|---------------------------------------|----------------------|-------------------|----------------------------------------|
|                      |                                       | HBV log 2 (ratio)    | HCV log 2 (ratio) | Non viral (non-B, non-C) log 2 (ratio) |
| Up-regulated genes   |                                       |                      |                   |                                        |
| 1                    | ODAM                                  | 6.14                 | 0                 | 9.05                                   |
| 2                    | CPLX2                                 | 5.32                 | 0                 | 10.41                                  |
| 3                    | SULT4A1                               | 5.21                 | 0                 | 4.19                                   |
| 4                    | PAPPA2                                | 5.02                 | 0                 | 3.13                                   |
| 5                    | FAM133A                               | 4.7                  | 0                 | 5.22                                   |
| 6                    | MEOX2;<br>MEOX2-AS1                   | 4.17                 | 0                 | 3.55                                   |
| 7                    | NBPF22P                               | 3.94                 | 0                 | 5.19                                   |
| 8                    | THBS4                                 | 3.91                 | 0                 | 2.58                                   |
| 9                    | GPC3                                  | 3.58                 | 0                 | 5.24                                   |
| 11                   | SMPX                                  | 3.14                 | 0                 | 4.03                                   |
| 12                   | NKD1                                  | 2.9                  | 0                 | 3.33                                   |
| 13                   | BRDTP1                                | 2.3                  | 0                 | 3.19                                   |
| 14                   | RDM1                                  | 1.99                 | 0                 | 2.76                                   |
| Down-regulated genes |                                       |                      |                   |                                        |
| 1                    | IL1RAPL2                              | -1.52                | 0                 | -2.18                                  |
| 2                    | VSIG4                                 | -1.68                | 0                 | -2.18                                  |
| 3                    | MRC1                                  | -1.76                | 0                 | -2.44                                  |

|   |                          |       |   |       |
|---|--------------------------|-------|---|-------|
| 4 | CYP2C8                   | -2.4  | 0 | -2.68 |
| 5 | SPP2                     | -2.51 | 0 | -2.75 |
| 6 | KCNJ16                   | -3.14 | 0 | -3.2  |
| 7 | MXD4                     | -3.47 | 0 | -3.83 |
| 8 | TDRD1                    | -4.33 | 0 | -4.62 |
| 9 | LRRC75A-AS1;<br>SNORD49B | -4.62 | 0 | 4.58  |

Supplementary Table 5. Data Common HCV& nonBnonC

| Crt. No.           | Differentially expressed genes (DEGs) | Tumor group etiology |                      |                                              |
|--------------------|---------------------------------------|----------------------|----------------------|----------------------------------------------|
|                    |                                       | HBV<br>log 2 (ratio) | HCV<br>log 2 (ratio) | Non viral<br>(non-B, non-C)<br>log 2 (ratio) |
| Up-regulated genes |                                       |                      |                      |                                              |
| 1                  | GRINA                                 | 0                    | 1.22                 | 3.48                                         |
| 2                  | GLI4; ZFP41                           | 0                    | 1.35                 | 3.74                                         |
| 3                  | TUBB                                  | 0                    | 1.38                 | 1.26                                         |
| 4                  | BSG                                   | 0                    | 1.39                 | 3.15                                         |
| 5                  | RNF187                                | 0                    | 1.45                 | 2.35                                         |
| 6                  | SNRPB                                 | 0                    | 1.46                 | 2.04                                         |
| 7                  | PABPC1                                | 0                    | 1.48                 | 1.93                                         |
| 8                  | HGS                                   | 0                    | 1.52                 | 2.13                                         |
| 9                  | MROH1                                 | 0                    | 1.56                 | 2.41                                         |
| 10                 | GLMP; TMEM79                          | 0                    | 1.68                 | 1.98                                         |
| 11                 | PVT1                                  | 0                    | 1.74                 | 2.08                                         |
| 12                 | PRKDC                                 | 0                    | 1.77                 | 1.63                                         |
| 13                 | TMEM150B                              | 0                    | 1.79                 | 3.31                                         |
| 14                 | ALDOA                                 | 0                    | 1.83                 | 2.97                                         |
| 15                 | MSTO1; STO2P                          | 0                    | 1.89                 | 2.18                                         |
| 16                 | SCRIB                                 | 0                    | 1.96                 | 3.92                                         |
| 17                 | SQSTM1                                | 0                    | 1.99                 | 2.24                                         |
| 18                 | TKT                                   | 0                    | 2.07                 | 3.3                                          |
| 19                 | SLC26A6                               | 0                    | 2.14                 | 3.02                                         |
| 20                 | EZH2                                  | 0                    | 2.22                 | 2.57                                         |
| 21                 | NDRG1                                 | 0                    | 2.3                  | 2.08                                         |
| 22                 | ASPH                                  | 0                    | 2.38                 | 2.87                                         |
| 23                 | TXNRD1                                | 0                    | 2.38                 | 2.44                                         |
| 24                 | COL5A3                                | 0                    | 2.4                  | 3.27                                         |
| 25                 | CDRT1; TRIM16                         | 0                    | 2.45                 | 3.99                                         |
| 26                 | HIST1H2AD; HIST1H3D                   | 0                    | 2.46                 | 2.91                                         |
| 27                 | HMGA1                                 | 0                    | 2.46                 | 3.29                                         |
| 28                 | SRXN1                                 | 0                    | 2.5                  | 2.69                                         |
| 29                 | FBXW10; RIM16L                        | 0                    | 2.74                 | 3.17                                         |
| 30                 | MCM4                                  | 0                    | 2.91                 | 2.3                                          |
| 31                 | LUCAT1                                | 0                    | 3.09                 | 4.16                                         |

|                             |                                                        |   |       |       |
|-----------------------------|--------------------------------------------------------|---|-------|-------|
| 32                          | CABYR                                                  | 0 | 3.12  | 4.94  |
| 33                          | ROBO1                                                  | 0 | 3.2   | 2.06  |
| 34                          | HIST1H2AL; IST1H2BM;<br>HIST1H2BN; HIST1H2BO;<br>OR2B6 |   | 3.31  | 3.64  |
| 35                          | MCM2                                                   | 0 | 3.47  | 2.7   |
| 36                          | RAD54L                                                 | 0 | 3.61  | 3.29  |
| 37                          | RECQL4                                                 | 0 | 3.65  | 4.71  |
| 38                          | SPINK5                                                 | 0 | 4.47  | 3.2   |
| 39                          | HIST1H2AK;<br>HIST1H2BL                                | 0 | 3.78  | 4.89  |
| 40                          | TICRR                                                  | 0 | 3.88  | 2.73  |
| 41                          | NQO1                                                   | 0 | 3.93  | 4.14  |
| 42                          | DIAPH3                                                 | 0 | 3.94  | 2.32  |
| 43                          | POLQ                                                   | 0 | 4.0   | 2.35  |
| 44                          | PTPRQ                                                  | 0 | 4.03  | 7.35  |
| 45                          | ZFPM2-AS1                                              | 0 | 4.03  | 3.48  |
| 46                          | HIST1H2AL                                              | 0 | 4.07  | 3.86  |
| 47                          | TLX1                                                   | 0 | 4.07  | 3.09  |
| 48                          | FBXO43                                                 | 0 | 4.22  | 2.9   |
| 49                          | SERINC2                                                | 0 | 4.37  | 5.48  |
| 50                          | CNTNAP4;                                               | 0 | 4.78  | 4.1   |
| 51                          | SNX29                                                  | 0 | 4.87  | 5.28  |
| 52                          | AKR1B10; KR1B15                                        | 0 | 5.33  | 5.08  |
| 53                          | ALDH3A1                                                | 0 | 5.96  | 8.89  |
| 54                          | IGF2BP1                                                | 0 | 6.37  | 4.36  |
| 55                          | BAGE; BAGE3; BAGE4;<br>BAGE5; TPTE                     | 0 | 6.93  | 5.82  |
| 56                          | LSP1P3                                                 | 0 | 7.33  | 5.94  |
| 57                          | RIMS2                                                  | 0 | 7.46  | 5.29  |
| 58                          | SPINK4                                                 | 0 | 10.18 | 13.45 |
| 59                          | ACTL8                                                  | 0 | 11.23 | 9.12  |
| <b>Down-regulated genes</b> |                                                        |   |       |       |
| 1                           | PKHD1                                                  | 0 | -3.99 | -2.76 |
| 2                           | LINC01093                                              | 0 | -3.96 | -3.19 |
| 3                           | GPM6A                                                  | 0 | -3.86 | -3.22 |
| 4                           | ADGRB3                                                 | 0 | -3.85 | -2.62 |
| 5                           | HHIP                                                   | 0 | -2.96 | -2.57 |
| 6                           | CYP3A43                                                | 0 | -2.94 | -1.36 |
| 7                           | ATOH7                                                  | 0 | -2.79 | -2.28 |
| 8                           | HBB; HBD                                               | 0 | -2.79 | -2.57 |
| 9                           | EPHA3                                                  | 0 | -2.73 | -2.48 |
| 10                          | PDGFRA                                                 | 0 | -2.71 | -3.16 |
| 11                          | C8A                                                    | 0 | -2.68 | -1.44 |
| 12                          | ASIC5; TDO2                                            | 0 | -2.66 | -2.47 |
| 13                          | SOCS2                                                  | 0 | -2.5  | -3.25 |
| 14                          | MMRN1                                                  | 0 | -2.48 | -2.01 |
| 15                          | SLC7A2                                                 | 0 | -2.47 | -1.99 |
| 16                          | JCHAIN                                                 | 0 | -2.45 | -2.67 |

|    |             |   |       |       |
|----|-------------|---|-------|-------|
| 17 | TDRD15      | 0 | -1.99 | -3.02 |
| 18 | AMDHD1      | 0 | -2.4  | -1.73 |
| 19 | HPX         | 0 | -2.35 | -1.8  |
| 20 | NAT1; NAT2  | 0 | -2.35 | -2.41 |
| 21 | MACC1       | 0 | -2.33 | -3.23 |
| 22 | IL1RAP      | 0 | -2.24 | -1.89 |
| 23 | PKHD1L1     | 0 | -2.19 | -2.19 |
| 24 | SH3YL1      | 0 | -2.19 | -2.37 |
| 25 | GLYATL1     | 0 | -2.16 | -2.06 |
| 26 | SLC38A4     | 0 | -2.05 | -1.61 |
| 27 | CYBRD1      | 0 | -2.01 | -1.77 |
| 28 | DAB1        | 0 | -1.99 | -1.72 |
| 29 | CYP2E1      | 0 | -1.95 | -1.77 |
| 30 | APOF; STAT2 | 0 | -1.91 | -1.81 |
| 31 | PLA2R1      | 0 | -1.89 | -1.75 |
| 32 | A2M; PZP    | 0 | -1.81 | -1.73 |
| 33 | ACAA2       | 0 | -1.76 | -1.64 |
| 34 | SOCS2-AS1   | 0 | -1.67 | -1.63 |
| 35 | PLG         | 0 | -1.52 | -1.75 |
| 36 | PLSCR4      | 0 | -1.52 | -2.07 |
| 37 | ID2         | 0 | -1.47 | -1.8  |

Supplementary Table 6. List of up and down-regulated genes in HBV related HCC

| HBV unique upregulated in tumor | FC    | HBV unique downregulated in tumor                                                                                                                                                                                                                                                  | FC    |
|---------------------------------|-------|------------------------------------------------------------------------------------------------------------------------------------------------------------------------------------------------------------------------------------------------------------------------------------|-------|
| SCGB1D2                         | 13.44 | MEG8;MIR370;MIR411;MIR494;SNHG24;SNORD113-1;SNORD113-2;SNORD113-4;SNORD113-9;SNORD114-1;SNORD114-10;SNORD114-11;SNORD114-13;SNORD114-14;SNORD114-17;SNORD114-26;SNORD114-27;SNORD114-28;SNORD114-29;SNORD114-30;SNORD114-31;SNORD114-4;SNORD114-5;SNORD114-6;SNORD114-7;SNORD114-8 | -5.25 |
| DSCR8                           | 11    | CLEC1B                                                                                                                                                                                                                                                                             | -5.11 |
| PAGE4                           | 9.58  | FCN2                                                                                                                                                                                                                                                                               | -4.9  |
| ODAM;PRR27                      | 9.41  | LINC0001;PRSS55                                                                                                                                                                                                                                                                    | -4.47 |
| HOXC9                           | 8.61  | CRHBP                                                                                                                                                                                                                                                                              | -4.14 |
| SFTA1P                          | 8.57  | MIR10A                                                                                                                                                                                                                                                                             | -4.06 |
| CSN1S2BP                        | 8.39  | THSD7A                                                                                                                                                                                                                                                                             | -3.79 |
| MIR552                          | 6.41  | DSCAM                                                                                                                                                                                                                                                                              | -3.63 |
| BAGE;BAGE3;BAGE4;BAGE5          | 5.46  | BBOX1                                                                                                                                                                                                                                                                              | -3.54 |



|                                     |      |
|-------------------------------------|------|
| PEG10                               | 5.29 |
| LOC101928775                        | 5.24 |
| LOC80078                            | 4.98 |
| MAGEA1                              | 4.74 |
| SPINK1                              | 4.7  |
| CTNNA2;LOC101927987                 | 4.68 |
| MIR4441                             | 4.53 |
| HOXA10;HOXA10-HOXA9;HOXA9           | 4.43 |
| LOC100421746;PAGE5                  | 4.21 |
| MGAM2                               | 3.74 |
| ALG1L                               | 3.45 |
| LOC101928911;SPACA1                 | 3.31 |
| NOTUM                               | 3.31 |
| KIF4A                               | 3.08 |
| MIR325;MIR325HG                     | 3.04 |
| MIR4454                             | 2.9  |
| LGR5                                | 2.81 |
| IFI27                               | 2.69 |
| MGC32805;SNCAIP                     | 2.58 |
| FAM53A                              | 2.5  |
| SLC5A6                              | 2.47 |
| HOXA3                               | 2.37 |
| PTCHD4                              | 2.28 |
| EGFEM1P                             | 2.28 |
| MROH2A                              | 2.25 |
| ST8SIA3                             | 2.21 |
| LINC01010;LOC101928231;LOC101928304 | 2.19 |
| LOC101927334                        | 1.92 |
| CDHR3                               | 1.44 |
| ATP6AP1L                            | 1.38 |

|                           |       |
|---------------------------|-------|
| HAO2;HSD3B2               | -3.44 |
| PLCXD3                    | -3.4  |
| LRRC7                     | -3.28 |
| GBA3;MIR548AJ2            | -3.26 |
| ADAMTS13                  | -3.16 |
| ECM1                      | -3.12 |
| CDH19                     | -3.09 |
| FAM47E-STBD1              | -3.06 |
| KDM8                      | -2.81 |
| DPT                       | -2.53 |
| IL5RA                     | -2.45 |
| NPY1R                     | -2.33 |
| ALLC                      | -2.31 |
| CCL19                     | -2.29 |
| FGF14;FGF14-IT1           | -2.2  |
| KCNE1                     | -2.18 |
| TDO2                      | -2.18 |
| TPTE2                     | -2.16 |
| XDH                       | -2.14 |
| FCRL3                     | -2.13 |
| KIAA1456                  | -2.12 |
| HSD17B13                  | -2.11 |
| FAM188B;INMT;INMT-FAM188B | -2.1  |
| DTHD1                     | -2.09 |
| MYO10                     | -2.02 |
| CXCL2                     | -1.98 |
| CPEB3                     | -1.95 |
| IFNG-AS1;IL26             | -1.92 |
| CD163                     | -1.92 |
| RASGEF1B                  | -1.92 |
| FBP1                      | -1.87 |
| EMBP1                     | -1.87 |
| ANXA10                    | -1.82 |
| PHLDA1                    | -1.79 |
| LINC00548;LINC00598       | -1.75 |
| MT1L;MT2A                 | -1.71 |

|                             |       |
|-----------------------------|-------|
| MS4A6A                      | -1.69 |
| LILRA6;LILRB2;LILRB3;LILRB5 | -1.66 |
| CCDC141;TTN                 | -1.63 |
| CEP128;TSHR                 | -1.55 |
| LOC101927156                | -1.25 |

Supplementary Table 7. List of up and down-regulated genes in HCV related HCC

| HCV unique upregulated in tumor | FC    | HCV unique downregulated in tumor | FC    |
|---------------------------------|-------|-----------------------------------|-------|
| REG3A                           | 10.59 | CNTN3                             | -5.8  |
| ANKRD33                         | 10.38 | GRIN2B                            | -5.73 |
| LINC00162                       | 9.68  | FREM2                             | -5.63 |
| TUBA3C                          | 9.17  | MIR378H                           | -5.62 |
| MIR5007                         | 8.83  | TRPV6                             | -5.53 |
| KHDC1L                          | 8.48  | FAM83F;LOC100130899               | -5.36 |
| ALX1                            | 8.29  | MUC6                              | -5.32 |
| CYP2C9                          | 8.14  | CFTR                              | -5.26 |
| FSTL5                           | 8.05  | SLC22A1                           | -3.12 |
| LINC01142                       | 7.54  | MROH2B                            | -5.02 |
| CLVS2                           | 7.46  | GABRB3                            | -5    |
| CARD18                          | 7.32  | ACSM6;CYP2C8                      | -4.89 |
| LINC00564                       | 7.3   | GABRP                             | -4.89 |
| PRAME                           | 7.3   | SLC5A1                            | -4.75 |
| CDH9                            | 7.28  | CXCL14                            | -4.57 |
| MIR631                          | 7.25  | IGF2;INS;INS-IGF2                 | -4.5  |
| OR8A1;OR8G1                     | 7.22  | GRHL2                             | -4.49 |
| LOC101929645                    | 7.2   | GLS2                              | -4.36 |
| LINC01419                       | 7.14  | VIPR1                             | -4.12 |
| GALNT5                          | 7.13  | ADGRG7                            | -4.09 |
| LINC00906;LOC102724958          | 7.01  | PROM1                             | -4.09 |
| NPSR1-AS1                       | 6.95  | LRRTM3                            | -4.06 |
| LINC01611                       | 6.91  | CYP1A2                            | -3.98 |
| LOC102723828                    | 6.89  | CTNNA3                            | -3.97 |
| CD200R1                         | 6.86  | PWRN1;PWRN2;PWRN3                 | -3.96 |
| LOC101929694                    | 6.84  | KCNN2                             | -3.93 |

|                               |      |
|-------------------------------|------|
| LOC101927081                  | 6.78 |
| CNTNAP2                       | 6.74 |
| LOC102723968                  | 6.63 |
| LOC344887                     | 6.56 |
| CYTL1;LOC101928306            | 6.55 |
| LOC101929584                  | 6.43 |
| TRIM71                        | 6.36 |
| MMP13                         | 6.32 |
| FEZF1-AS1                     | 6.25 |
| CSMD1                         | 6.13 |
| SKA1                          | 6.13 |
| GRM7-AS3                      | 6.08 |
| CDH7                          | 6.05 |
| ST8SIA6-AS1                   | 5.96 |
| CCDC144NL                     | 5.89 |
| ZIC4                          | 5.88 |
| MYBPC1                        | 5.84 |
| CASC20                        | 5.76 |
| ABCB5                         | 5.57 |
| C12orf56                      | 5.56 |
| NEK2                          | 5.55 |
| OSTN                          | 5.54 |
| BIRC5                         | 5.52 |
| TERT                          | 5.5  |
| DMP1                          | 5.48 |
| NPFFR2                        | 5.45 |
| PPP2R2C                       | 5.44 |
| XIRP2                         | 5.41 |
| LOC101927062                  | 5.31 |
| LINC00942                     | 5.28 |
| IBSP                          | 5.26 |
| LINC00002                     | 5.2  |
| CCDC169;CCDC169-SOHLH2;SOHLH2 | 5.16 |
| KIF2C                         | 5.12 |
| PBK                           | 5.12 |
| HAVCR1                        | 5.1  |

|                        |       |
|------------------------|-------|
| SYT9                   | -3.92 |
| MFSD2A                 | -3.77 |
| BMP10                  | -3.74 |
| HAND2-AS1              | -3.61 |
| AJAP1                  | -3.55 |
| ESRRG                  | -3.53 |
| SHBG                   | -3.53 |
| FENDRR                 | -3.51 |
| AGBL4                  | -3.41 |
| LOC100506869           | -3.36 |
| GNAO1                  | -3.3  |
| OR5AK2;OR5AK4P         | -3.3  |
| BZRAP1;MIR142          | -3.27 |
| MIR1247                | -3.26 |
| SCN7A                  | -3.26 |
| IDO2                   | -3.23 |
| TIMD4                  | -3.21 |
| CLSTN2                 | -3.12 |
| FLJ22763               | -3.12 |
| MOGAT2                 | -3.05 |
| NCAM1                  | -3.02 |
| CYP2B6;CYP2B7P         | -3.01 |
| ASPG                   | -2.98 |
| UROCI                  | -2.97 |
| PCK1                   | -2.93 |
| PGLYRP2                | -2.92 |
| BCHE                   | -2.91 |
| FAM65C                 | -2.89 |
| GSTA2                  | -2.82 |
| ACSM3                  | -2.81 |
| TNFRSF13B              | -2.81 |
| COL4A3                 | -2.73 |
| FAM47E-STBD1;STBD1     | -2.69 |
| FAM129C                | -2.62 |
| LINC00924;LINC01197    | -2.62 |
| CYP2C18;CYP2C19;CYP2C9 | -2.59 |

|            |      |
|------------|------|
| KIF20A     | 5.09 |
| E2F7       | 5.08 |
| CCNYL2     | 5.04 |
| CNTN6      | 5.04 |
| C21orf91   | 5.01 |
| LINC00648  | 5.01 |
| HMGA2      | 4.98 |
| DLGAP5     | 4.97 |
| NCAPG      | 4.94 |
| GTSF1      | 4.9  |
| CYP19A1    | 4.89 |
| ROS1       | 4.87 |
| CEP55      | 4.84 |
| IGF2BP3    | 4.84 |
| ERC2       | 4.82 |
| TSPEAR     | 4.8  |
| CDC45      | 4.76 |
| TTK        | 4.71 |
| UHRF1      | 4.68 |
| GPR158     | 4.67 |
| MATN3      | 4.66 |
| SH3GL3     | 4.64 |
| AXDND1     | 4.62 |
| CDCA2      | 4.62 |
| CKAP2L     | 4.62 |
| SULT1C2    | 4.59 |
| TRIP13     | 4.59 |
| MCM10      | 4.57 |
| XIRP1      | 4.57 |
| ZNF444     | 4.57 |
| CEACAM20   | 4.54 |
| RGS13      | 4.54 |
| WDR75      | 4.52 |
| BUB1B;PAK6 | 4.52 |
| LRFN5      | 4.46 |
| SPTA1      | 4.45 |

|                                      |       |
|--------------------------------------|-------|
| LIFR-AS1                             | -2.57 |
| GRAMD1C                              | -2.56 |
| ANKRD55                              | -2.49 |
| COL19A1                              | -2.49 |
| NIPAL1                               | -2.49 |
| UGT2B10;UGT2B28;UGT2B7               | -2.49 |
| LRRC4C                               | -2.48 |
| HAL                                  | -2.47 |
| FCRL2                                | -2.45 |
| CETP                                 | -2.44 |
| RDH16;ZBTB39                         | -2.43 |
| RIC3                                 | -2.42 |
| GLYAT                                | -2.4  |
| IGF1                                 | 2.61  |
| TTR                                  | -2.39 |
| CYP3A4;CYP3A5;CYP3A7;CYP3A7-CYP3A51P | -2.38 |
| HSD17B2                              | -2.28 |
| FGB                                  | -2.26 |
| OR10J5                               | -2.25 |
| IL1RL1                               | -2.24 |
| C9;DAB2;FYB                          | -2.23 |
| FGFR2                                | -2.22 |
| NR4A1                                | -2.2  |
| LOC200772                            | -2.19 |
| FBLN5                                | -2.18 |
| PLA2G5                               | -2.18 |
| AZGP1                                | -2.17 |
| FXYP1;FXYP7                          | -2.15 |
| FAM110C                              | -2.13 |
| PRELP                                | -2.12 |
| AQP1;FAM188B;INMT;INMT-FAM188B       | -2.09 |
| ERRFI1                               | -2.03 |
| RBMS3                                | -2.03 |
| SPINT2                               | -1.96 |
| TAT;ZNF19;ZNF23                      | -1.96 |
| F11                                  | -1.95 |

|                        |      |
|------------------------|------|
| RPL10L                 | 4.42 |
| MIR4426                | 4.41 |
| SLCO1C1                | 4.38 |
| KIF14                  | 4.36 |
| TCN1                   | 4.35 |
| MKRN3                  | 4.34 |
| HIST1H3B               | 4.33 |
| MUC15                  | 4.33 |
| CDKN3                  | 4.32 |
| PPP1R15B               | 4.3  |
| GTSE1                  | 4.29 |
| GSDMC                  | 4.28 |
| BRSK2                  | 4.23 |
| CASC9                  | 4.21 |
| KIF23                  | 4.13 |
| RFX8                   | 4.11 |
| CACNA1E                | 4.1  |
| LINC01060              | 4.1  |
| MIR2052;MIR2052HG;PI15 | 4.1  |
| MIR3144                | 4.1  |
| POSTN                  | 4.05 |
| HHLA2                  | 4.04 |
| FAM111B                | 4.02 |
| LINC00491              | 3.99 |
| LINC01229              | 3.99 |
| DUXAP8                 | 3.98 |
| CD200R1L               | 3.92 |
| LINC01468              | 3.92 |
| NRCAM                  | 3.9  |
| CALCR                  | 3.86 |
| NEIL3                  | 3.81 |
| SLC2A5                 | 3.81 |
| CDCA3                  | 3.8  |
| SLC28A2                | 3.8  |
| ZFPM2                  | 3.8  |
| GPSM2                  | 3.78 |

|                     |       |
|---------------------|-------|
| ALLC;COLEC11        | -1.94 |
| CPN1                | -1.94 |
| FCRL1               | -1.94 |
| GSTA1;GSTA3         | -1.89 |
| PTGIS               | -1.86 |
| SERPINF2            | -1.86 |
| GCH1                | -1.85 |
| FABP1               | -1.83 |
| LINC01197           | -1.82 |
| ADAMTS1             | -1.81 |
| ADAMTSL3            | -1.81 |
| ID1;MIR3193         | -1.78 |
| ITGA9               | -1.77 |
| MEF2C-AS1           | -1.77 |
| ADRA1B;LOC101927766 | -1.76 |
| COL14A1             | -1.76 |
| PANK1               | -1.7  |
| APOH                | -1.69 |
| OGDHL               | -1.69 |
| CYR61               | -1.65 |
| GADD45B             | -1.64 |
| LIPG                | -1.63 |
| SIK1                | -1.63 |
| SYNPO2              | -1.63 |
| C1R;C1RL            | -1.57 |
| AGXT                | -1.55 |
| MAT1A               | -1.55 |
| PEG3;ZIM2           | -1.55 |
| ACSL1               | -1.53 |
| ABAT                | -1.51 |
| BDH2                | -1.51 |
| DUSP1               | -1.5  |
| MPC1                | -1.5  |
| SLC27A2             | -1.47 |
| FGL1                | -1.45 |
| GABARAPL1           | -1.41 |

|                      |      |
|----------------------|------|
| TFAP2A               | 3.78 |
| APCDD1L              | 3.76 |
| EGFEM1P;LOC100507661 | 3.76 |
| OSR2                 | 3.76 |
| EBF2                 | 3.74 |
| LOC613266            | 3.71 |
| CRNDE                | 3.7  |
| OR2AG1               | 3.7  |
| PABPC4L              | 3.69 |
| PYCR1                | 3.68 |
| RIBC2                | 3.66 |
| C5orf46              | 3.64 |
| WDR62                | 3.61 |
| ILDR2                | 3.57 |
| HIST1H2AB            | 3.56 |
| KIAA0101             | 3.55 |
| PPP1R1B              | 3.53 |
| GAD1                 | 3.5  |
| KIF11                | 3.49 |
| PKIA-AS1             | 3.47 |
| ZWINT                | 3.47 |
| FXVD3                | 3.46 |
| AURKA                | 3.41 |
| LOC339862            | 3.41 |
| MAEL                 | 3.41 |
| IL31RA               | 3.4  |
| PRR19                | 3.4  |
| RACGAP1              | 3.4  |
| SMKR1;STRIP2         | 3.4  |
| PRR11                | 3.39 |
| TMEM74               | 3.39 |
| TRPC3                | 3.39 |

|                                                                                                                                                                                                                                                         |       |
|---------------------------------------------------------------------------------------------------------------------------------------------------------------------------------------------------------------------------------------------------------|-------|
| SLC38A2                                                                                                                                                                                                                                                 | -1.41 |
| DGAT2                                                                                                                                                                                                                                                   | -1.4  |
| THBS1                                                                                                                                                                                                                                                   | -1.35 |
| PPP1R3B                                                                                                                                                                                                                                                 | -1.34 |
| IRF8                                                                                                                                                                                                                                                    | -1.33 |
| MEG8;MIR370;SNHG24;SNORD113-1;SNORD113-2;SNORD113-4;SNORD113-5;SNORD113-6;SNORD114-1;SNORD114-10;SNORD114-14;SNORD114-17;SNORD114-20;SNORD114-21;SNORD114-23;SNORD114-28;SNORD114-30;SNORD114-31;SNORD114-4;SNORD114-5;SNORD114-6;SNORD114-7;SNORD114-8 | -1.32 |
| GOT1                                                                                                                                                                                                                                                    | -1.31 |
| MUT                                                                                                                                                                                                                                                     | -1.3  |
| MYOT                                                                                                                                                                                                                                                    | -1.28 |
| ABCA10;ABCA5;ABCA6;ABCA8;ABCA9;PRO1804                                                                                                                                                                                                                  | -1.19 |
| LINC00987;LOC101930452;LOC642846                                                                                                                                                                                                                        | -0.89 |

|                             |      |
|-----------------------------|------|
| ADAM23                      | 3.38 |
| CENPM                       | 3.36 |
| LOC101929771                | 3.36 |
| RMST                        | 3.36 |
| BRDT;EPHX4                  | 3.35 |
| HIST1H3J                    | 3.34 |
| OLFML2B                     | 3.33 |
| CD109                       | 3.32 |
| FOXN4                       | 3.32 |
| MEPE                        | 3.25 |
| ADAM12                      | 3.24 |
| UBE2U                       | 3.23 |
| LINC01301                   | 3.21 |
| E2F2                        | 3.18 |
| PARPBP                      | 3.17 |
| LRP1B                       | 3.16 |
| MSC                         | 3.15 |
| LOC101927592                | 3.14 |
| HIST1H2BB                   | 3.12 |
| ECT2                        | 3.1  |
| NOX4                        | 3.1  |
| HIST1H3I                    | 3.09 |
| GDNF                        | 3.08 |
| LINGO1                      | 3.08 |
| MIR193A                     | 3.08 |
| PTHLH                       | 3.06 |
| TRPC7                       | 3.06 |
| SPHK1                       | 3.05 |
| SUSD4                       | 3.05 |
| HIST1H2AJ;HIST1H2AK         | 2.98 |
| HIST1H2AG;HIST1H2AH;MIR3143 | 2.97 |
| WNT5A                       | 2.96 |
| KPNA2                       | 2.95 |
| LINC01021                   | 2.94 |
| GJC1                        | 2.93 |
| DNAJC6                      | 2.92 |

|                                         |      |
|-----------------------------------------|------|
| BBC3;MIR3191                            | 2.91 |
| RNF144A-AS1                             | 2.9  |
| WFDC21P                                 | 2.89 |
| C6orf141                                | 2.88 |
| DUOX2                                   | 2.88 |
| LOC101928858                            | 2.87 |
| STIL                                    | 2.87 |
| CAPN9                                   | 2.86 |
| PPFIA4                                  | 2.86 |
| TCF19                                   | 2.86 |
| LINC01594                               | 2.84 |
| CELSR3;MIR4793                          | 2.83 |
| DUXAP10;LINC01296                       | 2.81 |
| LOX                                     | 2.81 |
| LOC440982;ZIC1                          | 2.79 |
| BCAT1                                   | 2.78 |
| LINC01426                               | 2.78 |
| ZNF385D                                 | 2.78 |
| SLC44A5                                 | 2.77 |
| FCAMR                                   | 2.76 |
| HELLS                                   | 2.74 |
| HOXC4;HOXC5;HOXC6                       | 2.74 |
| C21orf58                                | 2.69 |
| TMEM232                                 | 2.69 |
| BTNL8                                   | 2.66 |
| LINC00470                               | 2.62 |
| CENPL                                   | 2.58 |
| LOC441666                               | 2.55 |
| ARHGAP11B;LOC100288637                  | 2.53 |
| LOC654342                               | 2.52 |
| LOC101928622                            | 2.51 |
| C5orf45                                 | 2.5  |
| FANCI                                   | 2.5  |
| DNAH12                                  | 2.49 |
| HIST1H2AE;HIST1H2BE;HIST1H2BF;HIST1H2BI | 2.47 |
| FAM78B                                  | 2.44 |



|                              |      |
|------------------------------|------|
| GPR35                        | 2.44 |
| ADAMTS14                     | 2.43 |
| CECR7                        | 2.42 |
| LMNB2                        | 2.42 |
| ACSM1                        | 2.41 |
| MGAM                         | 2.4  |
| PLCB1                        | 2.4  |
| ITGB3                        | 2.38 |
| UBD                          | 2.38 |
| DNAH8                        | 2.37 |
| LINC00535                    | 2.33 |
| FABP5                        | 2.31 |
| MAP2                         | 2.31 |
| GOLGA2P7;LOC642423           | 2.3  |
| FIGNL2                       | 2.28 |
| INCENP                       | 2.27 |
| ADM                          | 2.23 |
| P4HA2                        | 2.23 |
| GAP43                        | 2.22 |
| LMNB1                        | 2.22 |
| TSPEAR;TSPEAR-AS1;TSPEAR-AS2 | 2.22 |
| AURKB;LINC00324              | 2.21 |
| BBS7;CCNA2                   | 2.21 |
| MTL5                         | 2.21 |
| TUBA1C                       | 2.2  |
| LOC100507195                 | 2.14 |
| ITGA5                        | 2.12 |
| HN1                          | 2.11 |
| BRIP1                        | 2.1  |
| HIST2H2BC;HIST2H2BE          | 2.09 |
| MCM3                         | 2.07 |
| MCM6                         | 2.06 |
| SCARA3                       | 2.06 |
| SQLE;ZNF572                  | 2.06 |
| LINC01134                    | 2.03 |
| SMC4                         | 2.02 |

|                     |      |
|---------------------|------|
| CSTA                | 1.99 |
| CDC25B;LOC101929125 | 1.97 |
| KCNMB2;KCNMB2-AS1   | 1.97 |
| PKM                 | 1.94 |
| CALCA               | 1.92 |
| IL4I1;NUP62         | 1.91 |
| SERPINH1            | 1.89 |
| SPAG5               | 1.88 |
| STIP1               | 1.87 |
| CCT3                | 1.85 |
| SLC29A4             | 1.85 |
| FBXL8;HSF4          | 1.84 |
| ENO1                | 1.83 |
| MMP14;MRPL52        | 1.83 |
| BRCA1               | 1.82 |
| DTNA                | 1.81 |
| EML6                | 1.79 |
| GSDMD;ZC3H3         | 1.79 |
| RRP12               | 1.78 |
| SOGA1               | 1.78 |
| LOC100288152;SLC9A3 | 1.76 |
| ANXA2               | 1.75 |
| ENAH                | 1.7  |
| MIR3917;PAQR7;STMN1 | 1.68 |
| VPS45               | 1.68 |
| CKAP2               | 1.67 |
| CKAP4               | 1.67 |
| DLAT                | 1.67 |
| GUCY1B2             | 1.65 |
| LRRC37A8P;RDM1      | 1.65 |
| H2AFZ               | 1.64 |
| LINC01515           | 1.63 |
| ADAMTS6             | 1.61 |
| LAMC1               | 1.61 |
| MCM8                | 1.61 |
| MIR5195             | 1.61 |

|                              |      |
|------------------------------|------|
| TDRKH                        | 1.61 |
| NME1;NME1-NME2;NME2          | 1.59 |
| HK1;HKDC1                    | 1.56 |
| XPOT                         | 1.55 |
| C1orf204;CFAP45;TAGLN2;VSIG8 | 1.53 |
| LINC01572;PMFBP1             | 1.5  |
| SCD                          | 1.48 |
| CHD1L                        | 1.47 |
| ACLY                         | 1.46 |
| ONECUT2                      | 1.45 |
| ITGA6                        | 1.42 |
| PSMD4                        | 1.4  |
| SAE1                         | 1.39 |
| TMEM64                       | 1.38 |
| TUBA1A;TUBA1B                | 1.38 |
| CFL1                         | 1.36 |
| NPLOC4                       | 1.33 |
| LRRCS9                       | 1.28 |
| MIR3610;RAD21                | 1.28 |
| CHEK1;STT3A                  | 1.19 |
| SSRP1                        | 1.14 |

Supplementary Table 8. List of up and down-regulated genes in non-viral HCC

| nonBnonC unique upregulated in tumor | FC    |
|--------------------------------------|-------|
| SLC22A12                             | 12.56 |
| GAGE2A                               | 11.86 |
| RPS17                                | 11.66 |
| HOXB13                               | 9.89  |

| nonBnonC unique downregulated in tumor                                                                                                                                                                                                                                                                                                   | FC    |
|------------------------------------------------------------------------------------------------------------------------------------------------------------------------------------------------------------------------------------------------------------------------------------------------------------------------------------------|-------|
| MEG8;MIR370;SNHG24;SNORD113-1;SNORD113-2;SNORD113-4;SNORD113-5;SNORD113-6;SNORD113-7;SNORD113-9;SNORD114-1;SNORD114-10;SNORD114-11;SNORD114-14;SNORD114-17;SNORD114-2;SNORD114-20;SNORD114-21;SNORD114-23;SNORD114-24;SNORD114-26;SNORD114-27;SNORD114-28;SNORD114-3;SNORD114-30;SNORD114-31;SNORD114-4;SNORD114-5;SNORD114-6;SNORD114-7 | -5.74 |
| AP1B1;RFPL1                                                                                                                                                                                                                                                                                                                              | -5.12 |
| ESRP1                                                                                                                                                                                                                                                                                                                                    | -4.41 |
| VTCN1                                                                                                                                                                                                                                                                                                                                    | -4.35 |

|                           |      |
|---------------------------|------|
| GIF                       | 9.72 |
| LINC01242                 | 9.46 |
| GIP                       | 9.09 |
| MAGEB2                    | 9.05 |
| CELA3A                    | 8.97 |
| CSN1S2AP;ODAM             | 8.59 |
| LINC01139                 | 7.5  |
| SNORD93                   | 7.31 |
| SLC6A2                    | 6.91 |
| FLNC                      | 6.36 |
| TGM3                      | 6.35 |
| CCDC136                   | 6.1  |
| LINC01322                 | 6.06 |
| CDH17                     | 6.02 |
| GRPR;MAGEB17              | 5.99 |
| GP2                       | 5.76 |
| FER1L6                    | 5.68 |
| LOC101927948;LOC101927967 | 5.68 |
| ENPP7P13                  | 5.66 |
| HSPB1                     | 5.65 |
| DCC                       | 5.6  |
| LOC101929645;LOC101929660 | 5.42 |
| LDLRAD1                   | 5.17 |
| RHBG                      | 5.12 |
| VCX                       | 4.95 |
| ISX                       | 4.91 |
| LOC653712                 | 4.8  |
| CCDC124                   | 4.71 |
| L1CAM                     | 4.57 |
| ORAOV1                    | 4.53 |
| DIO2                      | 4.51 |
| MYO1A                     | 4.46 |
| CAMK2A                    | 4.45 |
| SP5                       | 4.42 |

|                                                                                                                                                                               |       |
|-------------------------------------------------------------------------------------------------------------------------------------------------------------------------------|-------|
| STK32A                                                                                                                                                                        | -4.26 |
| ATP13A4                                                                                                                                                                       | -3.59 |
| PTPRZ1                                                                                                                                                                        | -3.58 |
| BDKRB1;BDKRB2                                                                                                                                                                 | -3.48 |
| SLC14A1                                                                                                                                                                       | -3.46 |
| FLG-AS1                                                                                                                                                                       | -3.41 |
| FLG;HRNR                                                                                                                                                                      | -3.34 |
| ERP27                                                                                                                                                                         | -3.3  |
| GALNT3                                                                                                                                                                        | -3.11 |
| IPW;PWAR1;PWAR5;PWARSN;SNORD109B;SNORD116-10;SNORD116-16;SNORD116-17;SNORD116-18;SNORD116-21;SNORD116-22;SNORD116-23;SNORD116-26;SNORD116-4;SNORD116-6;SNORD116-7;SNRPN;SNURF | -3.04 |
| FLRT2                                                                                                                                                                         | -2.89 |
| SULT1C4                                                                                                                                                                       | -2.85 |
| BMP5                                                                                                                                                                          | -2.82 |
| LINC00161                                                                                                                                                                     | -2.79 |
| TMEM156                                                                                                                                                                       | -2.74 |
| SAA2;SAA2-SAA4;SAA4                                                                                                                                                           | -2.73 |
| LUM                                                                                                                                                                           | -2.7  |
| RGS2                                                                                                                                                                          | -2.68 |
| LRRC17                                                                                                                                                                        | -2.66 |
| CASC15                                                                                                                                                                        | -2.57 |
| SCART1                                                                                                                                                                        | -2.57 |
| RASSF8                                                                                                                                                                        | -2.56 |
| LINC00844                                                                                                                                                                     | -2.55 |
| MBOAT2                                                                                                                                                                        | -2.55 |
| KCNJ15                                                                                                                                                                        | -2.53 |
| MAPK10                                                                                                                                                                        | -2.53 |
| AKR1D1                                                                                                                                                                        | -2.5  |
| PTPN13                                                                                                                                                                        | -2.46 |
| RXFP1                                                                                                                                                                         | -2.41 |
| CLEC12A                                                                                                                                                                       | -2.37 |
| DDX26B                                                                                                                                                                        | -2.37 |
| OAT                                                                                                                                                                           | -2.37 |
| VNN1                                                                                                                                                                          | -2.37 |
| ANKRD18DP;LMLN-AS1                                                                                                                                                            | -2.33 |

|                        |      |
|------------------------|------|
| CDH12                  | 4.4  |
| TERC                   | 4.38 |
| LINC01484              | 4.32 |
| HIST1H2AH;MIR3143      | 4.29 |
| ACHE                   | 4.27 |
| GCNT3                  | 4.27 |
| NECAB2;OSGIN1          | 4.23 |
| PTP4A3                 | 4.23 |
| MLST8                  | 4.19 |
| AFAP1-AS1              | 4.17 |
| MAGEC3                 | 4.13 |
| HIST1H4A               | 4.1  |
| RHPN1                  | 3.9  |
| LINC01124;LOC101926913 | 3.84 |
| SHANK2                 | 3.83 |
| SCUBE1                 | 3.74 |
| DFNB31                 | 3.71 |
| HSF1                   | 3.67 |
| TK1                    | 3.63 |
| CHTF18                 | 3.61 |
| AURKB                  | 3.6  |
| WNK4                   | 3.6  |
| CEP131                 | 3.58 |
| G6PD                   | 3.57 |
| CLVS1                  | 3.56 |
| LINC01108              | 3.56 |
| ADCK5                  | 3.54 |
| FAM83H                 | 3.52 |
| SHARPIN                | 3.51 |
| TONSL                  | 3.51 |
| ALDH1L1                | 3.49 |
| GPAA1                  | 3.44 |
| SLC52A2                | 3.44 |
| HIST1H2AM              | 3.43 |
| KIFC2                  | 3.43 |
| GLUL;LINC00272;RGS1    | 3.41 |

|                 |       |
|-----------------|-------|
| BICC1           | -2.32 |
| MIR1273E        | -2.31 |
| LRAT;RBM46      | -2.26 |
| NNMT            | -2.25 |
| DACH1           | -2.24 |
| SPACA7          | -2.23 |
| ETNPPL          | -2.2  |
| CXCL8           | -2.14 |
| LECT2           | -2.14 |
| SLC25A36        | -2.14 |
| ANK3            | -2.12 |
| HTR2A;HTR2A-AS1 | -2.12 |
| ARHGAP15        | -2.11 |
| SLC8A1          | -2.1  |
| CP              | -2.08 |
| PRICKLE1        | -2.07 |
| SRGN            | -2.05 |
| F9              | -2.04 |
| MIR99AHG        | -2.03 |
| CD226           | -2.02 |
| DYNC2H1         | -2.02 |
| ASS1            | -2.01 |
| CCDC3           | -2.01 |
| ENDOD1          | -1.98 |
| LAMA2           | -1.98 |
| TC2N            | -1.97 |
| SPIRE1          | -1.95 |
| GBA3            | -1.94 |
| SLPI            | -1.92 |
| C6              | -1.91 |
| SLFN12          | -1.91 |
| ZFP1            | -1.91 |
| LOC101928304    | -1.9  |
| NR4A3           | -1.88 |
| FAM66C;FAM90A1  | -1.87 |
| IGFBP7          | -1.87 |

|                           |      |
|---------------------------|------|
| AXIN2                     | 3.39 |
| ABHD1                     | 3.37 |
| PARP10                    | 3.34 |
| MDGA1                     | 3.33 |
| RPS16                     | 3.32 |
| SLC22A18                  | 3.32 |
| TP73                      | 3.3  |
| SLC6A9                    | 3.26 |
| COL1A1                    | 3.24 |
| CLSPN                     | 3.23 |
| LOC100506403;LOC101928269 | 3.22 |
| RPLP1                     | 3.22 |
| LOC148709                 | 3.21 |
| MIR3917;STMN1             | 3.21 |
| BCL2L12                   | 3.17 |
| MRPL4                     | 3.17 |
| CHRM3                     | 3.14 |
| ASPSR1                    | 3.13 |
| JOSD2                     | 3.12 |
| P2RY11;PPAN;PPAN-P2RY11   | 3.09 |
| CELSR3;MIR4793;NCKIPSD    | 3.07 |
| PKD1L2                    | 3.04 |
| KIAA1875                  | 3.03 |
| MOSPD3                    | 3.02 |
| PAK4                      | 3    |
| C19orf47                  | 2.99 |
| HGH1                      | 2.98 |
| ACSL6;MEIKIN              | 2.97 |
| LINC01226                 | 2.93 |
| HIST1H2BF                 | 2.92 |
| SLCO5A1                   | 2.92 |
| LINC01604                 | 2.91 |
| TMEM201                   | 2.9  |
| MIR325HG                  | 2.89 |
| LOC101927136              | 2.87 |
| CLCN7                     | 2.85 |

|               |       |
|---------------|-------|
| SPATA6        | -1.87 |
| DLG2          | -1.82 |
| GSTZ1         | -1.8  |
| CREB5         | -1.77 |
| SAMSN1        | -1.77 |
| EPGN;MTHFD2L  | -1.76 |
| TRIM22        | -1.76 |
| CDC42EP3      | -1.75 |
| SYTL2         | -1.74 |
| TF            | -1.74 |
| ANXA1         | -1.73 |
| WDR72         | -1.73 |
| BMS1P21;MBL1P | -1.72 |
| PKD4          | -1.71 |
| SCML4         | -1.68 |
| CYP4V2;KLKB1  | -1.67 |
| FSTL1;MIR198  | -1.65 |
| LRRK2         | -1.65 |
| UBXN8         | -1.64 |
| LST1          | -1.63 |
| PTPRC         | -1.6  |
| CRMP1;EVC     | -1.59 |
| ZNF211        | -1.59 |
| CPED1         | -1.58 |
| GYS2          | -1.58 |
| FGD4          | -1.56 |
| MBL2          | -1.53 |
| APOH;CEP112   | -1.52 |
| C5;TRAF1      | -1.51 |
| F2R           | -1.51 |
| GNB4          | -1.51 |
| APOL6         | -1.46 |
| FGG           | -1.43 |
| ADGRG6        | -1.42 |
| TCF4          | -1.4  |
| MAN1A1        | -1.34 |

|                   |      |
|-------------------|------|
| LINC00639         | 2.85 |
| NCAPH             | 2.84 |
| VPS28             | 2.83 |
| CLK2;SCAMP3       | 2.81 |
| MIB2              | 2.81 |
| FGFR4             | 2.8  |
| FOXP4             | 2.78 |
| IKBKKG            | 2.75 |
| ABCB8;ASIC3       | 2.74 |
| SPPL2B            | 2.74 |
| MROH6;NAPRT       | 2.73 |
| NDOR1             | 2.73 |
| ZNF517            | 2.73 |
| GBA               | 2.72 |
| RAD23A            | 2.72 |
| IGSF8             | 2.7  |
| GRN               | 2.69 |
| PIF1              | 2.69 |
| SMARCA4           | 2.69 |
| ARF1              | 2.68 |
| NUPR1             | 2.68 |
| C14orf80          | 2.67 |
| TCOF1             | 2.67 |
| SNTG1             | 2.64 |
| CHCHD10           | 2.63 |
| ATAD3A;ATAD3B     | 2.62 |
| EPHX1             | 2.62 |
| RPL8;ZNF34;ZNF517 | 2.61 |
| PIK3R2            | 2.6  |
| GAS2L1            | 2.58 |
| PKN1              | 2.57 |
| PMVK              | 2.57 |
| CCDC9             | 2.56 |

|                                                                                                                                                                                    |       |
|------------------------------------------------------------------------------------------------------------------------------------------------------------------------------------|-------|
| PHLDB2;PLCXD2                                                                                                                                                                      | -1.33 |
| GLUD1                                                                                                                                                                              | -1.28 |
| PSD3                                                                                                                                                                               | -1.28 |
| B2M                                                                                                                                                                                | -1.27 |
| PRDX4                                                                                                                                                                              | -1.27 |
| CD164                                                                                                                                                                              | -1.25 |
| ANKAR                                                                                                                                                                              | -1.24 |
| RPS15A                                                                                                                                                                             | -1.18 |
| RWDD3;TMEM56;TMEM56-RWDD3                                                                                                                                                          | -1.16 |
| TSHR                                                                                                                                                                               | -1.11 |
| PCDHGA1;PCDHGA10;PCDHGA11;PCDHGA12;PCDHGA2;PCDHGA3;PCDHGA4;PCDHGA5;PCDHGA6;PCDHGA7;PCDHGA8;PCDHGA9;PCDHGB1;PCDHGB2;PCDHGB3;PCDHGB4;PCDHGB5;PCDHGB6;PCDHGB7;PCDHGC3;PCDHGC4;PCDHGC5 | -0.95 |

|               |      |
|---------------|------|
| LRRC14        | 2.56 |
| CIZ1          | 2.53 |
| MYH14         | 2.53 |
| COPE          | 2.51 |
| CTSD;IFITM10  | 2.5  |
| TTL12         | 2.5  |
| AP1M1         | 2.49 |
| CLPTM1        | 2.49 |
| CYHR1         | 2.49 |
| LMNA          | 2.49 |
| NRBP2;PUF60   | 2.47 |
| BREA2;ZNF707  | 2.45 |
| DBP           | 2.45 |
| EPPK1;PLEC    | 2.45 |
| LAMTOR2       | 2.45 |
| TMEM74B       | 2.42 |
| TM7SF2;VPS51  | 2.41 |
| DLG5          | 2.4  |
| EMD           | 2.4  |
| PRKCSH        | 2.4  |
| CLIP3;THAP8   | 2.39 |
| MIR639;TECR   | 2.39 |
| GUK1          | 2.38 |
| IFRD2         | 2.38 |
| NCLN          | 2.38 |
| NDUFS6        | 2.38 |
| ATP6V0D1      | 2.36 |
| JRK           | 2.36 |
| EPN1          | 2.35 |
| FBXO31        | 2.34 |
| RSPO2         | 2.34 |
| HSPA1A;HSPA1B | 2.33 |
| MTMR11;SF3B4  | 2.33 |
| VAR5          | 2.33 |
| CTSA          | 2.31 |
| SYNGR2        | 2.31 |



|                    |      |
|--------------------|------|
| DCST2;LOC100505666 | 2.3  |
| MAFG;SIRT7         | 2.29 |
| MIR3672            | 2.29 |
| NFKB2              | 2.29 |
| TRIM55             | 2.29 |
| ZC3H3              | 2.29 |
| FAM3A              | 2.26 |
| GDI1               | 2.25 |
| RARA               | 2.25 |
| C7orf50;COX19      | 2.24 |
| FLNA               | 2.24 |
| ATP13A2            | 2.23 |
| DDX12P             | 2.23 |
| FANCA              | 2.23 |
| MAF1               | 2.21 |
| SLC25A39           | 2.21 |
| ZNF730             | 2.21 |
| NDUFS8             | 2.2  |
| MRPL38             | 2.19 |
| MYO15B             | 2.19 |
| RNPEPL1            | 2.17 |
| ANAPC11            | 2.16 |
| ASNA1              | 2.15 |
| DNPH1              | 2.15 |
| PLXNA1             | 2.15 |
| NOTCH1             | 2.14 |
| SLC4A2             | 2.14 |
| TAF6               | 2.14 |
| NDUFB7             | 2.13 |
| PFDN6              | 2.13 |
| WBP2               | 2.13 |
| NIPAL2             | 2.12 |
| PLXNB2             | 2.12 |
| PQBP1              | 2.12 |
| GPR137             | 2.11 |
| CD74               | 2.1  |

|                           |      |
|---------------------------|------|
| GNB2                      | 2.1  |
| LSS                       | 2.1  |
| BCAR1                     | 2.09 |
| D2HGDH                    | 2.09 |
| TRAPPC9                   | 2.09 |
| ABHD4                     | 2.08 |
| SH3BP5L                   | 2.08 |
| TOR2A                     | 2.08 |
| EIF3K                     | 2.07 |
| ZSCAN31                   | 2.07 |
| ACTB                      | 2.06 |
| TRPM3                     | 2.06 |
| CDC42EP4                  | 2.05 |
| NCOA2                     | 2.05 |
| TMEM259                   | 2.04 |
| MYH9                      | 2.03 |
| RNH1                      | 2.03 |
| TSKU                      | 2.03 |
| MED15                     | 2.01 |
| ADHFE1;C8orf46;RRS1       | 1.99 |
| ATP1A1                    | 1.99 |
| BAG3                      | 1.98 |
| GAA                       | 1.98 |
| FKBP5;LOC285847           | 1.97 |
| RPP21;TRIM39;TRIM39-RPP21 | 1.96 |
| ABCF1                     | 1.95 |
| IQCE                      | 1.95 |
| ACTN4                     | 1.94 |
| KDM4B                     | 1.94 |
| DRAP1                     | 1.93 |
| NINJ1                     | 1.92 |
| AGO2                      | 1.91 |
| SGK223                    | 1.91 |
| APOE                      | 1.9  |
| FDPS                      | 1.9  |
| MRPL28                    | 1.9  |

|                         |      |
|-------------------------|------|
| NDUFA3                  | 1.9  |
| NPRL3                   | 1.9  |
| TMEM8A                  | 1.9  |
| COL18A1                 | 1.89 |
| H1FO                    | 1.89 |
| INPPL1                  | 1.89 |
| ETFB;VSIG10L            | 1.88 |
| ICK                     | 1.88 |
| LOC100133315;ZNF705E    | 1.88 |
| FAM20C                  | 1.85 |
| LMAN2                   | 1.85 |
| TWF2                    | 1.85 |
| ZBTB18                  | 1.85 |
| HIST1H2BJ;HIST1H2BK     | 1.84 |
| ZNF513                  | 1.84 |
| MSH5;MSH5-SAPCD1;SAPCD1 | 1.83 |
| AP3D1                   | 1.82 |
| 09-Sep                  | 1.81 |
| NCL                     | 1.81 |
| NELFB                   | 1.8  |
| LGALS3BP                | 1.79 |
| GSTT1                   | 1.78 |
| CTTN                    | 1.77 |
| DDX49                   | 1.77 |
| HNRNPA1;HNRNPA1P10      | 1.77 |
| SEC13                   | 1.76 |
| ANKMY1                  | 1.75 |
| DPAGT1;H2AFX            | 1.75 |
| HSP90AB1                | 1.75 |
| MAPKAPK2                | 1.75 |
| MIR4669;RXRA            | 1.75 |
| UBA1                    | 1.75 |
| TRAP1                   | 1.74 |
| GTF2F1;PSPN             | 1.73 |
| MSC-AS1                 | 1.73 |
| PTBP1                   | 1.72 |

|               |      |
|---------------|------|
| TALDO1        | 1.72 |
| U2AF2         | 1.71 |
| RPL18A        | 1.7  |
| ATP6V1C1      | 1.69 |
| FTL           | 1.68 |
| RUVBL2        | 1.68 |
| EEF1D         | 1.65 |
| GPX4          | 1.65 |
| LINC00189     | 1.65 |
| FAAP20        | 1.64 |
| DCAF7         | 1.63 |
| MDH2          | 1.63 |
| GPI;PDCD2L    | 1.62 |
| BHLHE40       | 1.59 |
| EIF4G1        | 1.59 |
| TMED9         | 1.58 |
| KRTCAP2       | 1.57 |
| TTC13         | 1.57 |
| RPS21         | 1.56 |
| CYC1          | 1.55 |
| CDC37;MIR1181 | 1.54 |
| EIF3H         | 1.54 |
| EEF2          | 1.51 |
| HSPA5         | 1.51 |
| CALM3         | 1.5  |
| PARP1         | 1.5  |
| TOMM20        | 1.5  |
| ECH1          | 1.47 |
| RPS2          | 1.46 |
| EWSR1         | 1.44 |
| HSP90AA1      | 1.44 |
| DAP           | 1.43 |
| ACTG1         | 1.42 |
| ARIH1;MIR630  | 1.41 |
| CDK11A;CDK11B | 1.39 |
| FTH1          | 1.39 |

|                    |      |
|--------------------|------|
| BST2               | 1.37 |
| P4HB               | 1.35 |
| GAPDH              | 1.34 |
| PTK2               | 1.34 |
| SMC1A              | 1.33 |
| PIIB               | 1.32 |
| SEPHS2             | 1.25 |
| NFE2L1             | 1.24 |
| CASC19;CCAT1;PCAT2 | 1.2  |

Supplementary Table 9. List of regulatory genes in HCV related group

|         |         |           |       |          |
|---------|---------|-----------|-------|----------|
| ABAT    | CENPF   | ERRF11    | ITGA6 | PRKDC    |
| ACAA2   | CENPL   | EZH2      | ITGA9 | PSMD4    |
| ACLY    | CENPM   | FASN      | ITGB3 | PYCR1    |
| ACSL1   | CFL1    | FGFR2     | KIF23 | RACGAP1  |
| ACSM1   | CFTR    | FOS       | KIF2C | RECQL4   |
| ACSM3   | CHEK1   | FOXO1     | LAMA3 | SERPINH1 |
| ACSM6   | COL14A1 | FXR1      | LAMC1 | SHBG     |
| ACTN2   | COL19A1 | FXR3      | LMNB1 | SKA1     |
| ADRA1B  | COL4A3  | GABARAPL1 | LMNB2 | SLC27A2  |
| AGXT    | COL7A1  | GAD1      | MCM2  | SLC38A2  |
| AKR1B10 | COLEC10 | GLYAT     | MCM3  | SLC5A1   |
| ALDH3A1 | CXCL12  | GLYATL1   | MCM4  | SMC4     |
| ALDOA   | CYP17A1 | GNAO1     | MCM6  | SQSTM1   |
| ALX1    | CYP19A1 | GOT1      | MCM8  | SSRP1    |
| AURKA   | CYP1A2  | GREB1     | MKI67 | STIP1    |

|         |         |         |        |        |
|---------|---------|---------|--------|--------|
| AURKB   | CYP2B6  | GRIN2B  | MOGAT2 | TAT    |
| BCHE    | CYP2C18 | GSTA1   | NAT1   | TFAP2A |
| BIRC5   | CYP2C9  | HGF     | NEK2   | THBS1  |
| BRCA1   | CYP2E1  | HGS     | NME1   | TKT    |
| BRIP1   | CYP3A4  | HMGA1   | NQO1   | TOP2A  |
| BUB1B   | CYP3A43 | HSD17B2 | OGDHL  | TPX2   |
| CACNA1E | DCN     | IGF1    | P4HA2  | TRPC3  |
| CCNB1   | DGAT2   | IGF2    | PCK1   | TRPV6  |
| CCT3    | DLAT    | IGF2BP1 | PDGFRA | TTR    |
| CDC25B  | DNAJC6  | IGF2BP3 | PKM    | TUBA1A |
| CDC25C  | DYNC1I1 | IGFBP3  | PLA2G5 | TUBA1C |
| CDC45   | EGF     | IL4I1   | PLG    | TUBB   |
| CDK1    | EGR1    | INCENP  | PPFIA4 | UBE2C  |
| CENPE   | ENO1    | ITGA5   | PRC1   | ZWINT  |

Supplementary Table 10. List of regulatory genes in non-viral group

|          |         |         |         |
|----------|---------|---------|---------|
| A2M      | DLG2    | HSPA5   | RUVEL2  |
| ACTB     | DYNC1I1 | IGF2BP1 | SEC13   |
| ACTG1    | EEF1D   | IGSF8   | SLC6A2  |
| ACTN2    | EEF2    | IKBKG   | SLC8A1  |
| AGO2     | EGR1    | INPPL1  | SMARCA4 |
| AKR1B10  | EIF3H   | LAMA3   | SNRPB   |
| ALDH3A1  | EIF3K   | LMNA    | SQSTM1  |
| ALDOA    | EMD     | MAFG    | TALDO1  |
| AP1B1    | EPN1    | MCM2    | TCF4    |
| AP1M1    | EWSR1   | MCM4    | TK1     |
| ARF1     | EZH2    | MYH9    | TP73    |
| ATP1A1   | F2R     | NCL     | TRAP1   |
| ATP6V0D1 | FANCA   | NFE2L1  | TUBB    |
| AURKB    | FASN    | NFKB2   | TWF2    |
| BAG3     | FLNC    | NQO1    | U2AF2   |
| BCAR1    | FOXO1   | OAT     | UBA1    |
| BSG      | FTH1    | PARP1   |         |
| C5       | GAPDH   | PIK3R2  |         |

|         |          |        |  |
|---------|----------|--------|--|
| CAMK2A  | GLUD1    | PRKDC  |  |
| CDC37   | GNB2     | PTBP1  |  |
| CDK11A  | GNB4     | PTK2   |  |
| COL1A1  | GSTT1    | RARA   |  |
| COL5A3  | HGF      | RECQL4 |  |
| COPE    | HGS      | RPL18A |  |
| CP      | HMGA1    | RPL8   |  |
| CTTN    | HNRNPA1  | RPLP1  |  |
| CXCL8   | HSF1     | RPS16  |  |
| CYP17A1 | HSP90AA1 | RPS17  |  |
| CYP2E1  | HSP90AB1 | RPS2   |  |
| DCAF7   | HSPA1A   | RPS21  |  |

Supplementary Table 11. Clustering of immune gene data by ClueGO

# ClueGOResults

| Clusters | GOID       | Term                                                                                                         | Term Pvalue, Bonferroni step down |
|----------|------------|--------------------------------------------------------------------------------------------------------------|-----------------------------------|
| Cluster1 | GO:0002280 | monocyte activation involved in immune response                                                              | 0.17470                           |
| Cluster1 | GO:0002780 | antibacterial peptide biosynthetic process                                                                   | 0.24500                           |
| Cluster1 | GO:0010729 | positive regulation of hydrogen peroxide biosynthetic process                                                | 0.38884                           |
| Cluster1 | GO:0015204 | urea transmembrane transporter activity                                                                      | 0.42971                           |
| Cluster1 | GO:0015250 | water channel activity                                                                                       | 0.19817                           |
| Cluster1 | GO:0015254 | glycerol channel activity                                                                                    | 0.41472                           |
| Cluster1 | GO:0015911 | long-chain fatty acid import across plasma membrane                                                          | 0.42740                           |
| Cluster1 | GO:0021930 | cerebellar granule cell precursor proliferation                                                              | 0.19817                           |
| Cluster1 | GO:0042167 | heme catabolic process                                                                                       | 0.41027                           |
| Cluster1 | GO:0042361 | menaquinone catabolic process                                                                                | 0.30407                           |
| Cluster1 | GO:0042376 | phyloquinone catabolic process                                                                               | 0.30407                           |
| Cluster1 | GO:0042822 | pyridoxal phosphate metabolic process                                                                        | 0.30407                           |
| Cluster1 | GO:0046951 | ketone body biosynthetic process                                                                             | 0.38884                           |
| Cluster1 | GO:0050051 | leukotriene-B4 20-monoxygenase activity                                                                      | 0.35198                           |
| Cluster1 | GO:0055062 | phosphate ion homeostasis                                                                                    | 0.10893                           |
| Cluster1 | GO:0070295 | renal water absorption                                                                                       | 0.38884                           |
| Cluster1 | GO:0090650 | cellular response to oxygen-glucose deprivation                                                              | 0.35198                           |
| Cluster1 | GO:1904929 | coreceptor activity involved in Wnt signaling pathway, planar cell polarity pathway                          | 0.41472                           |
| Cluster1 | GO:0021533 | cell differentiation in hindbrain                                                                            | 0.13625                           |
| Cluster1 | GO:0045649 | regulation of macrophage differentiation                                                                     | 0.13625                           |
| Cluster1 | GO:1901030 | positive regulation of mitochondrial outer membrane permeabilization involved in apoptotic signaling pathway | 0.04912                           |
| Cluster2 | GO:0046631 | alpha-beta T cell activation                                                                                 | 0.00000                           |
| Cluster2 | GO:0002503 | peptide antigen assembly with MHC class II protein complex                                                   | 0.07648                           |
| Cluster2 | GO:0002507 | tolerance induction                                                                                          | 0.00163                           |
| Cluster2 | GO:0002578 | negative regulation of antigen processing and presentation                                                   | 0.03229                           |
| Cluster2 | GO:0002643 | regulation of tolerance induction                                                                            | 0.00749                           |
| Cluster2 | GO:0002666 | positive regulation of T cell tolerance induction                                                            | 0.03229                           |
| Cluster2 | GO:0021879 | forebrain neuron differentiation                                                                             | 0.05618                           |
| Cluster2 | GO:0021902 | commitment of neuronal cell to specific neuron type in forebrain                                             | 0.01579                           |
| Cluster2 | GO:0031295 | T cell costimulation                                                                                         | 0.00023                           |
| Cluster2 | GO:0032660 | regulation of interleukin-17 production                                                                      | 0.04084                           |
| Cluster2 | GO:0032663 | regulation of interleukin-2 production                                                                       | 0.00141                           |
| Cluster2 | GO:0032722 | positive regulation of chemokine production                                                                  | 0.00257                           |
| Cluster2 | GO:0032743 | positive regulation of interleukin-2 production                                                              | 0.03240                           |
| Cluster2 | GO:0032753 | positive regulation of interleukin-4 production                                                              | 0.01783                           |
| Cluster2 | GO:0033634 | positive regulation of cell-cell adhesion mediated by integrin                                               | 0.01579                           |
| Cluster2 | GO:0045058 | T cell selection                                                                                             | 0.00002                           |
| Cluster2 | GO:0045061 | thymic T cell selection                                                                                      | 0.00031                           |
| Cluster2 | GO:0045589 | regulation of regulatory T cell differentiation                                                              | 0.00189                           |
| Cluster2 | GO:0045954 | positive regulation of natural killer cell mediated cytotoxicity                                             | 0.15046                           |
| Cluster2 | GO:0046633 | alpha-beta T cell proliferation                                                                              | 0.05525                           |
| Cluster2 | GO:0046635 | positive regulation of alpha-beta T cell activation                                                          | 0.00204                           |
| Cluster2 | GO:0046641 | positive regulation of alpha-beta T cell proliferation                                                       | 0.01241                           |
| Cluster2 | GO:0050854 | regulation of antigen receptor-mediated signaling pathway                                                    | 0.01643                           |
| Cluster2 | GO:0051712 | positive regulation of killing of cells of another organism                                                  | 0.02683                           |
| Cluster2 | GO:0070229 | negative regulation of lymphocyte apoptotic process                                                          | 0.03936                           |
| Cluster2 | GO:0070232 | regulation of T cell apoptotic process                                                                       | 0.04523                           |
| Cluster2 | GO:0071639 | positive regulation of monocyte chemotactic protein-1 production                                             | 0.05690                           |
| Cluster2 | GO:2000318 | positive regulation of T-helper 17 type immune response                                                      | 0.07111                           |
| Cluster2 | GO:2000514 | regulation of CD4-positive, alpha-beta T cell activation                                                     | 0.00301                           |
| Cluster2 | GO:2000516 | positive regulation of CD4-positive, alpha-beta T cell activation                                            | 0.04523                           |
| Cluster2 | GO:0002228 | natural killer cell mediated immunity                                                                        | 0.00000                           |
| Cluster2 | GO:0002715 | regulation of natural killer cell mediated immunity                                                          | 0.00034                           |
| Cluster3 | GO:0072178 | nephric duct morphogenesis                                                                                   | 0.05562                           |
| Cluster3 | GO:0001631 | cysteinyl leukotriene receptor activity                                                                      | 0.17470                           |
| Cluster3 | GO:0002003 | angiotensin maturation                                                                                       | 0.41027                           |
| Cluster3 | GO:0004875 | complement receptor activity                                                                                 | 0.38260                           |
| Cluster3 | GO:0004914 | interleukin-5 receptor activity                                                                              | 0.17470                           |
| Cluster3 | GO:0030862 | positive regulation of polarized epithelial cell differentiation                                             | 0.10401                           |
| Cluster3 | GO:0039008 | pronephric nephron tubule morphogenesis                                                                      | 0.10401                           |
| Cluster3 | GO:0045725 | positive regulation of glycogen biosynthetic process                                                         | 0.26740                           |
| Cluster3 | GO:0045959 | negative regulation of complement activation, classical pathway                                              | 0.43391                           |
| Cluster3 | GO:0048633 | positive regulation of skeletal muscle tissue growth                                                         | 0.38884                           |
| Cluster3 | GO:0060720 | spermatogonial cell proliferation                                                                            | 0.17470                           |
| Cluster3 | GO:0070986 | left/right axis specification                                                                                | 0.33646                           |
| Cluster3 | GO:0071377 | cellular response to glucagon stimulus                                                                       | 0.38260                           |
| Cluster3 | GO:0090191 | negative regulation of branching involved in ureteric bud morphogenesis                                      | 0.17470                           |
| Cluster3 | GO:0090721 | primary adaptive immune response involving T cells and B cells                                               | 0.10401                           |
| Cluster3 | GO:1900025 | negative regulation of substrate adhesion-dependent cell spreading                                           | 0.36998                           |
| Cluster3 | GO:1905665 | positive regulation of calcium ion import across plasma membrane                                             | 0.38260                           |
| Cluster3 | GO:2000467 | positive regulation of glycogen (starch) synthase activity                                                   | 0.35198                           |



Supplementary Figure 1. Histology (hematoxylin-eosin staining) for the HCC patients (non-viral, HBV and HCV etiology)

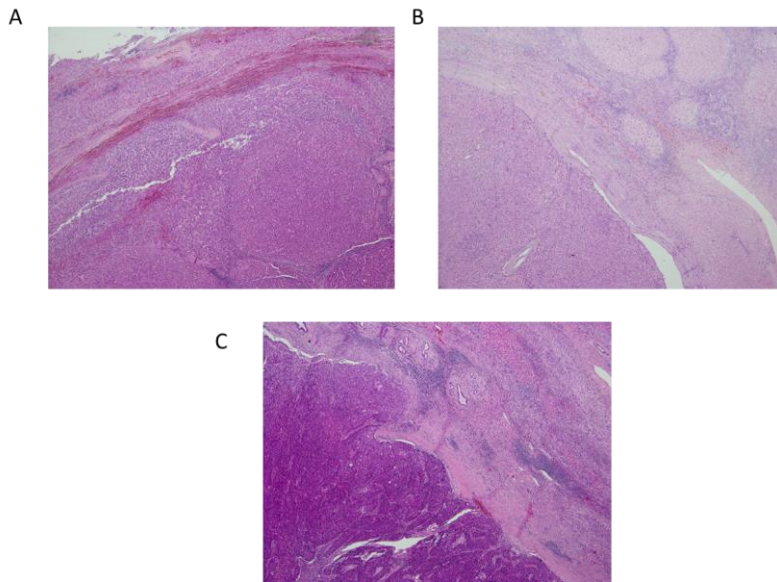

**A-Non-viral HCC; B- HBV HCC; C- HCV HCC (40X magnification)**

All patients enrolled in this study were diagnosed with HCC. Liver tumor samples were collected at the time of surgery. Histopathological parameters and tumor staging at diagnosis were determined (AJCC 7<sup>th</sup> ed.) and combined with surgical records and perioperative imaging. Tumor grading was performed according to the Edmondson–Steiner classification.

Supplementary Figure 2. Tuxedo pipeline

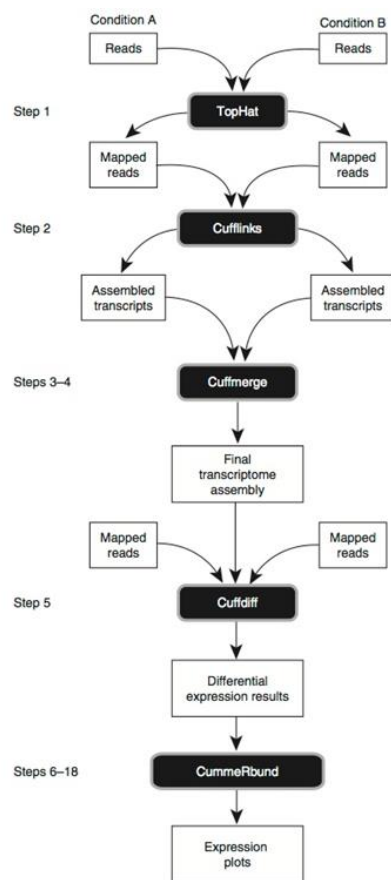

Supplementary Figure 3. HCV HUB and moonlighting genes enrichment

**HCV HUB genes**

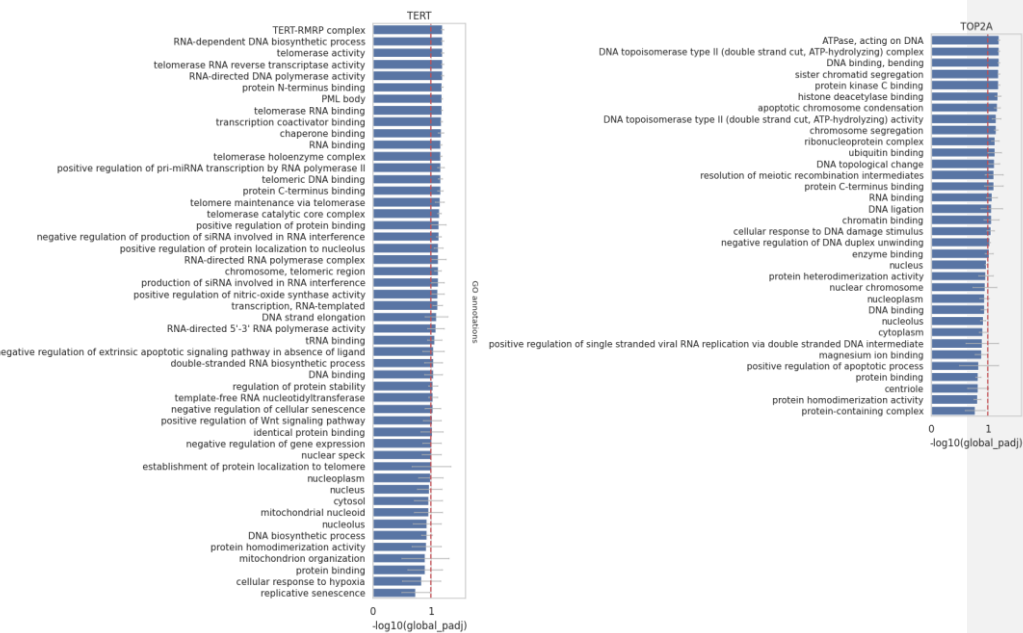

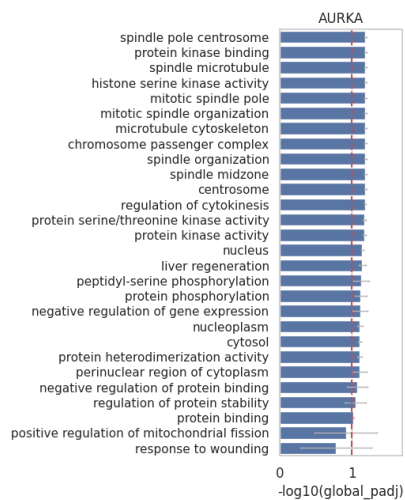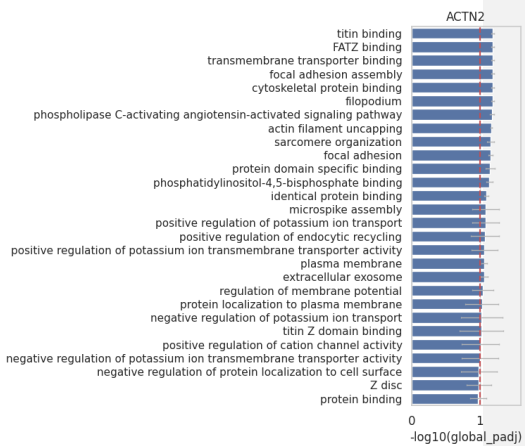

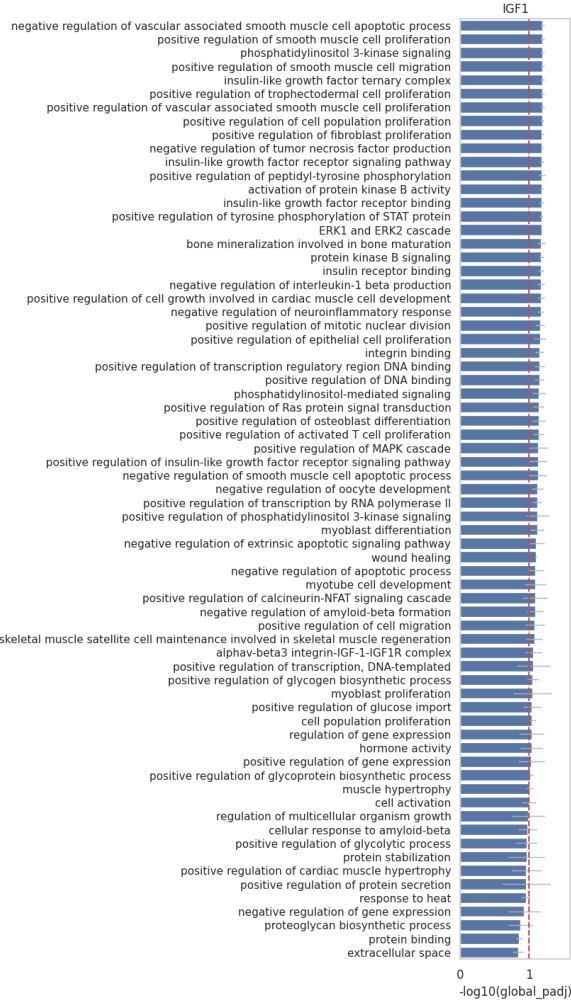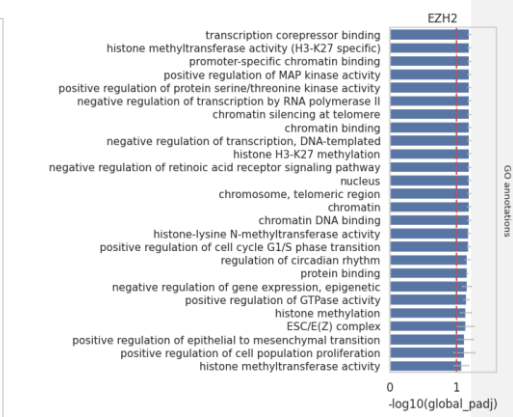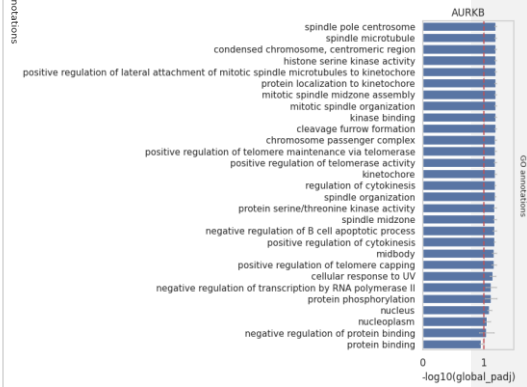

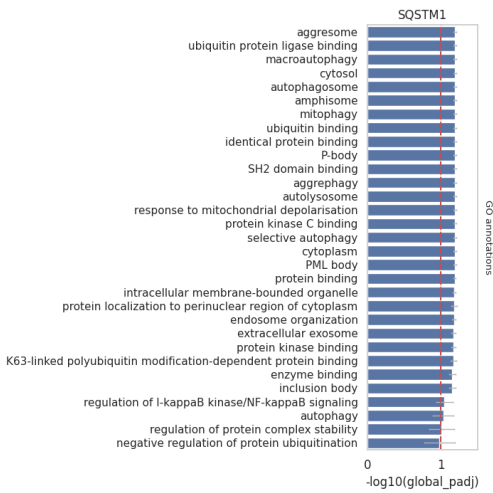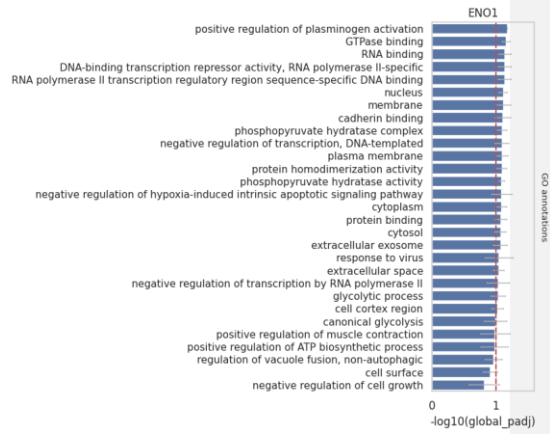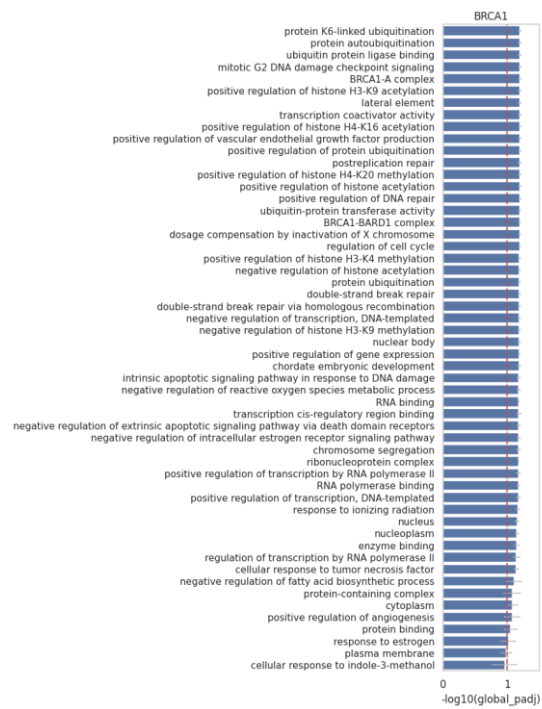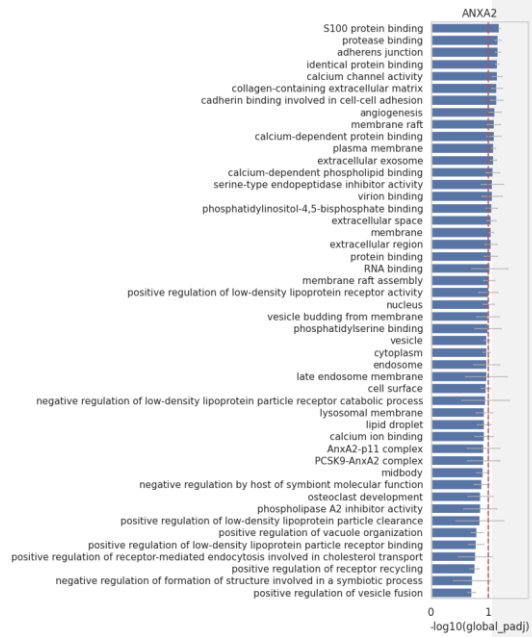

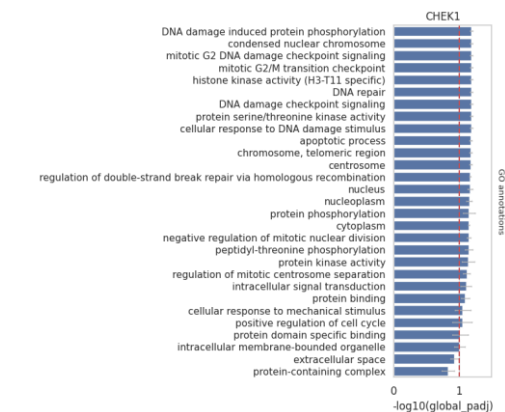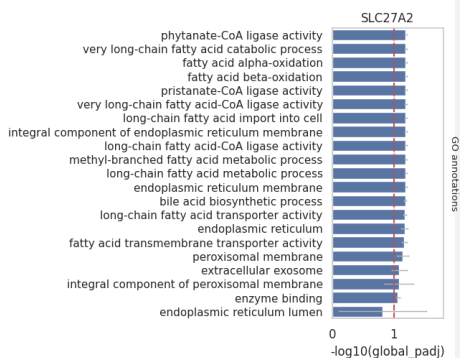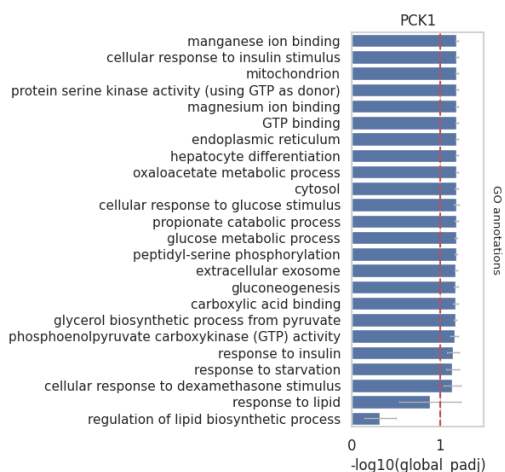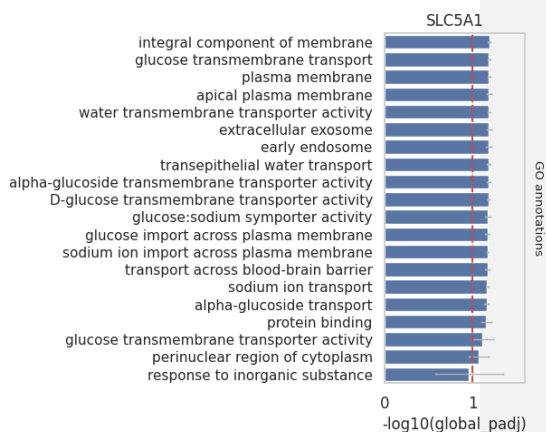

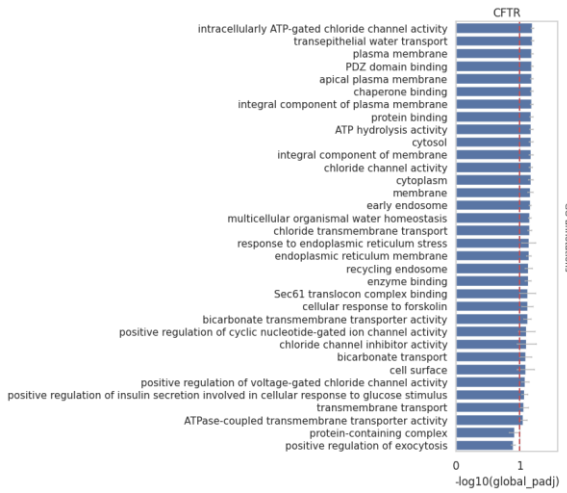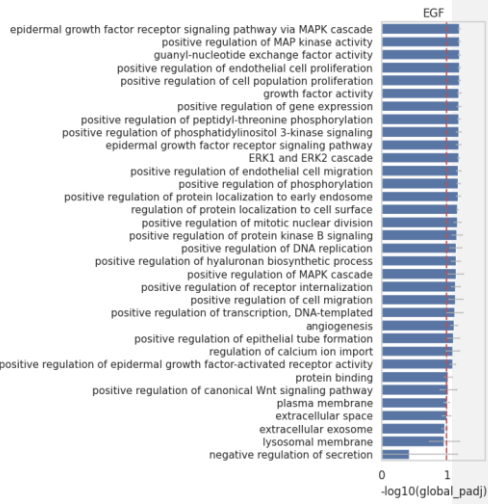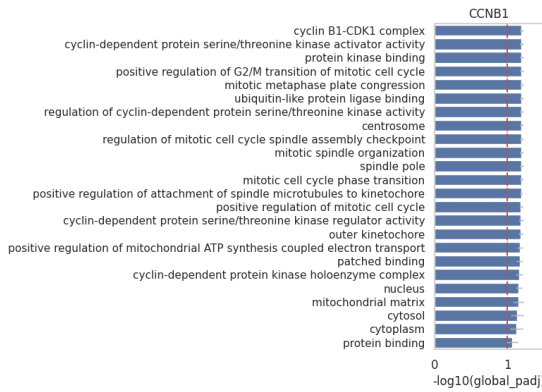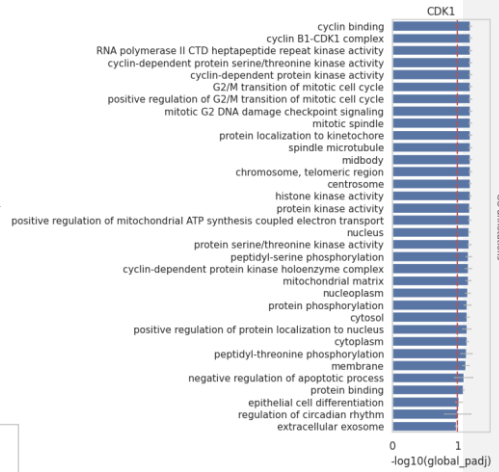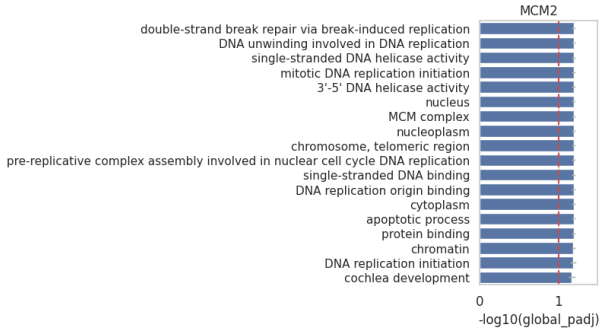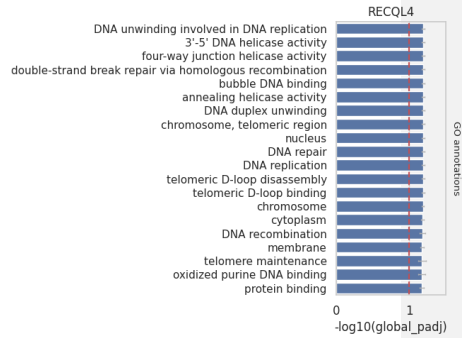



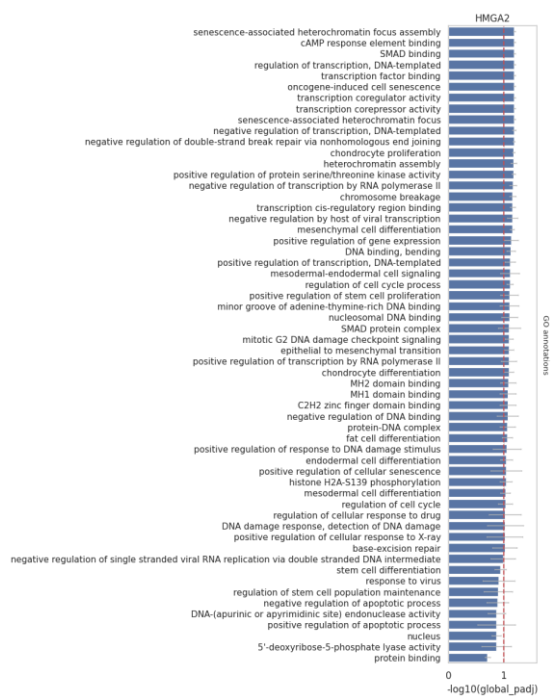

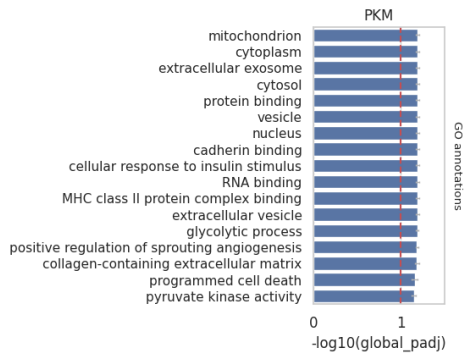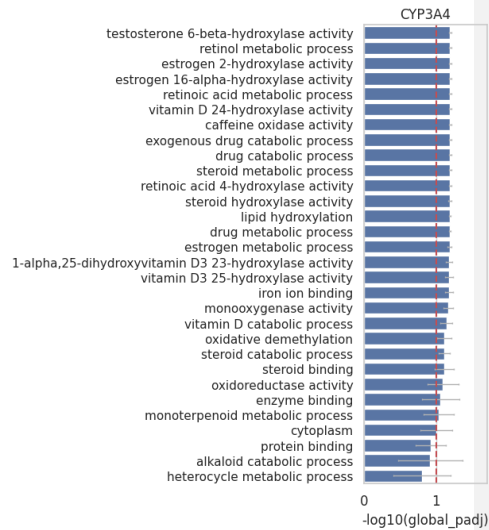

oxidoreductase activity, acting on paired donors, with incorporation or reduction of molecular oxygen, reduced flavin or flavoprotein as one donor, and incorporation of one atom of oxygen

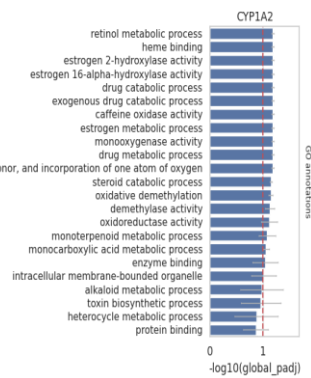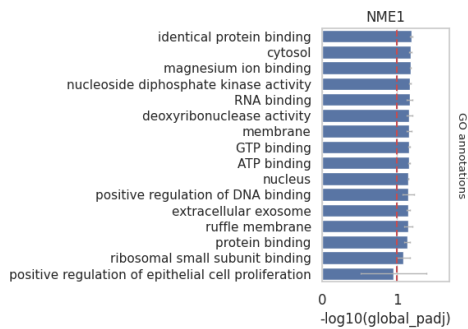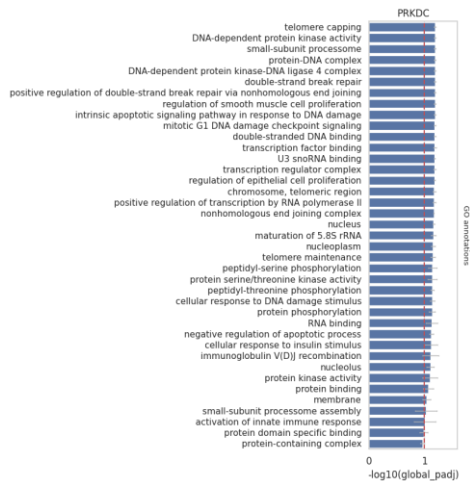

HCV Moonlightning gene

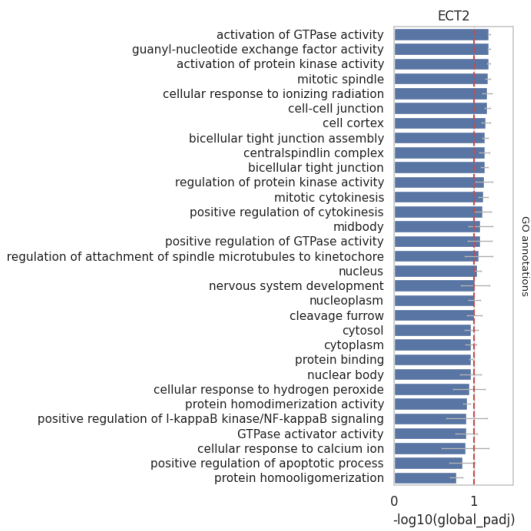

Supplementary Figure 4. nonBnonC HUB and moonlighting genes enrichment

nonBnonC HUB genes

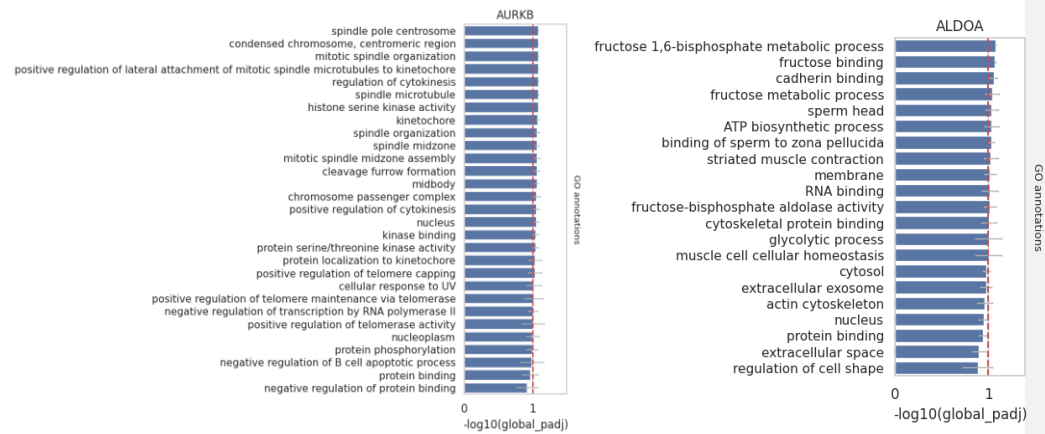

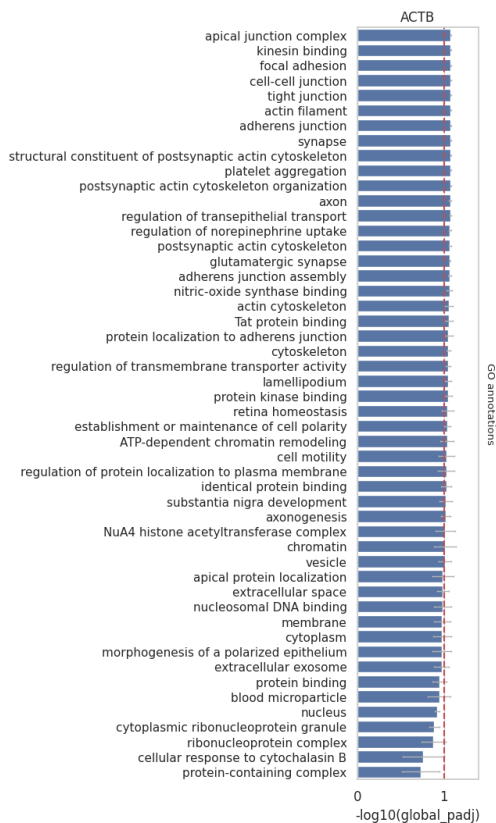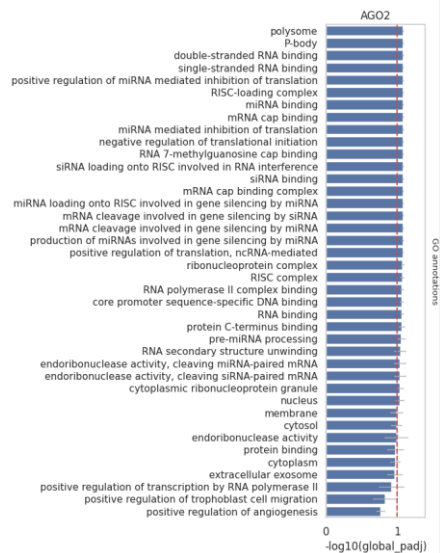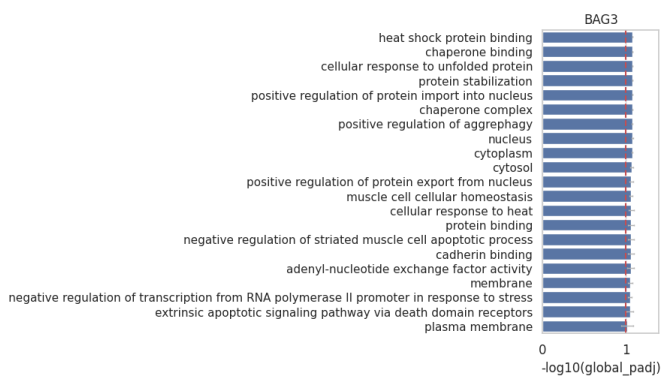

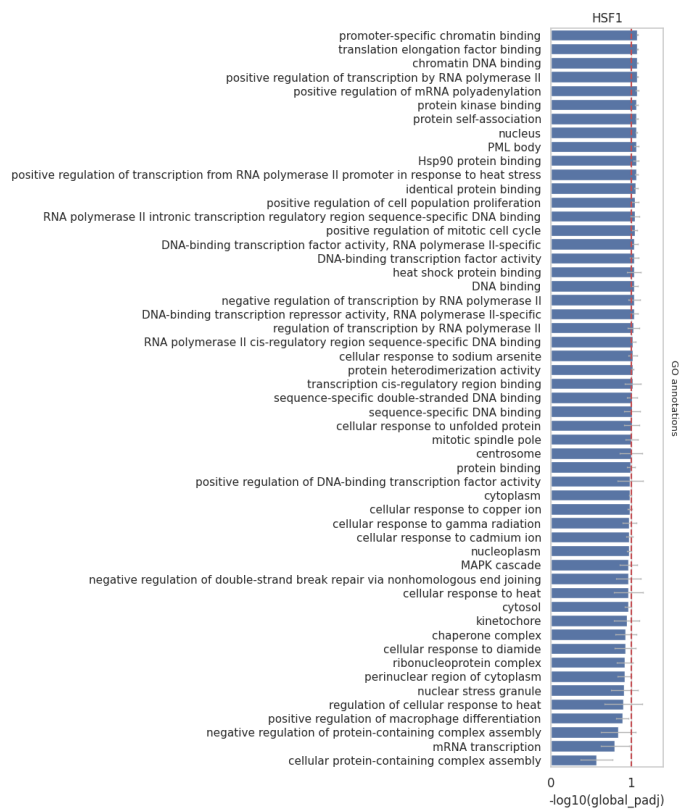

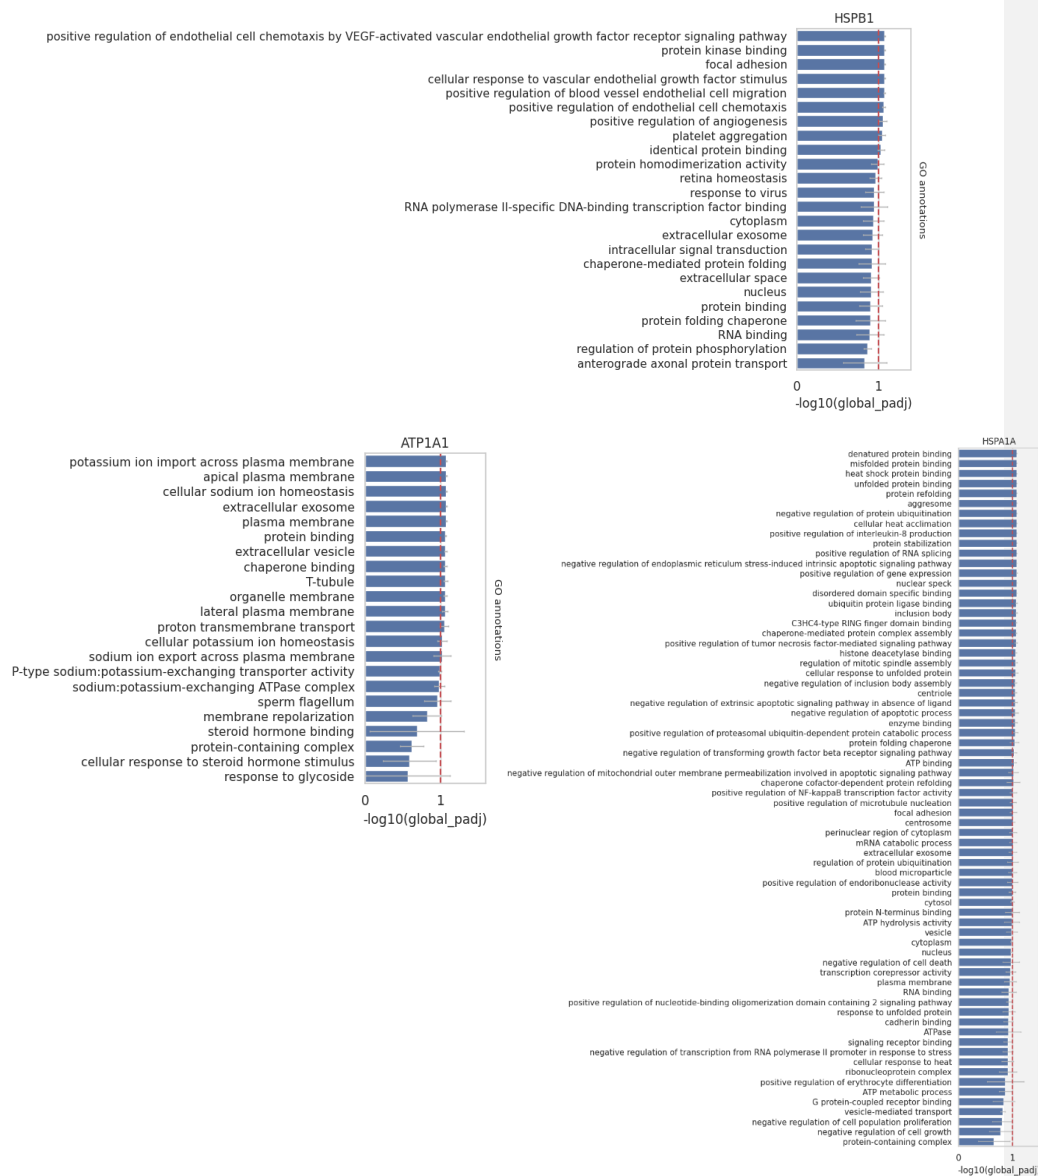

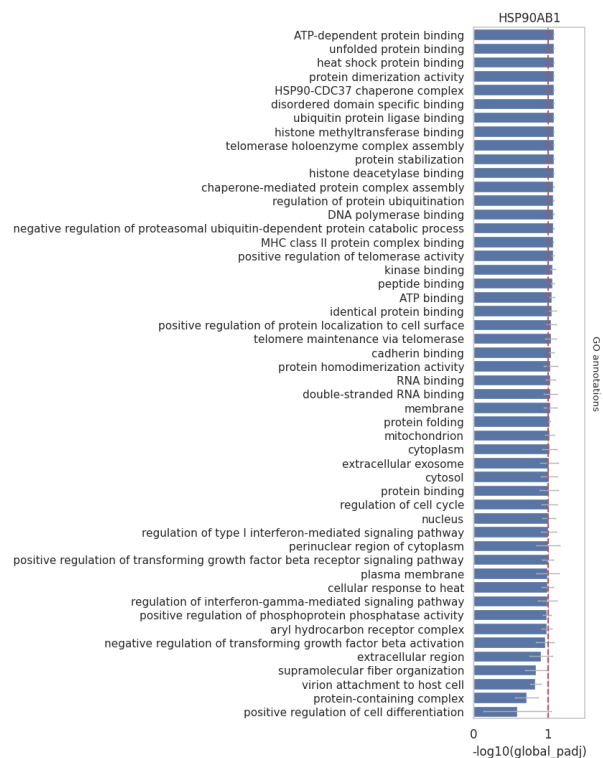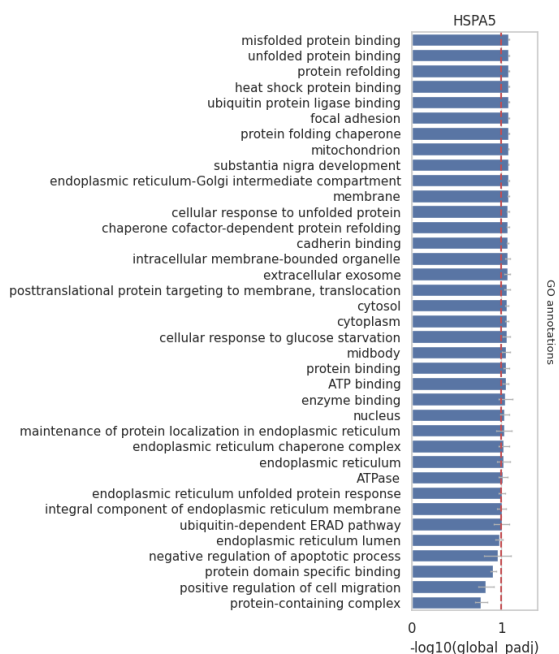



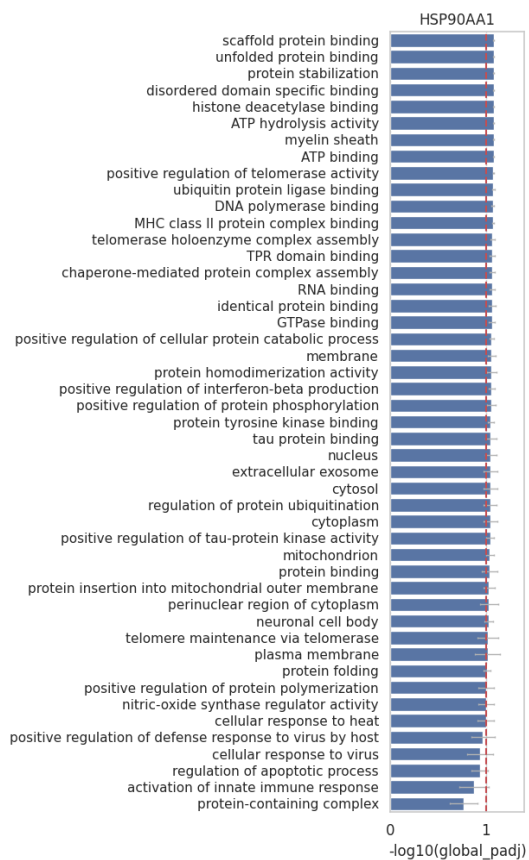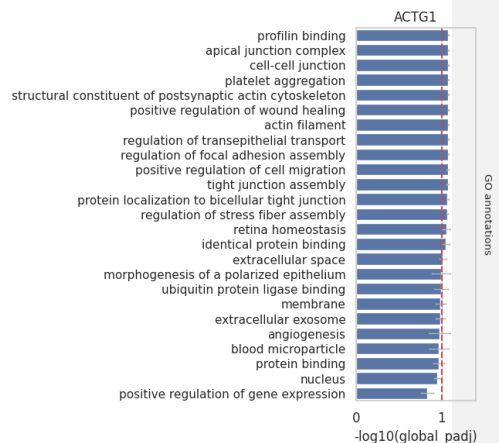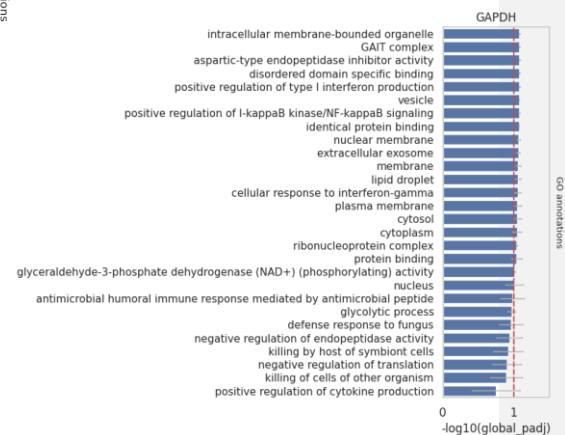

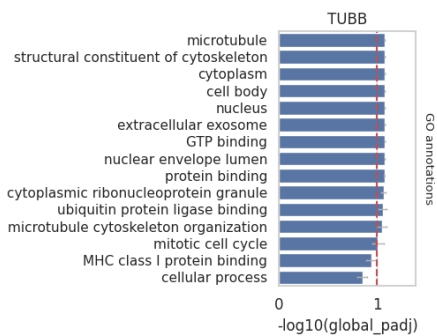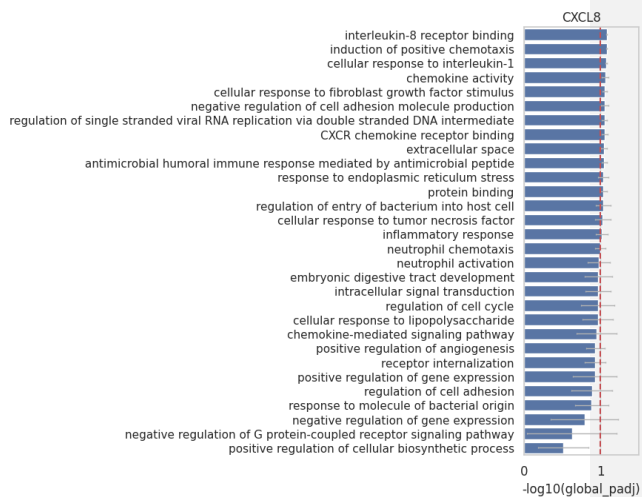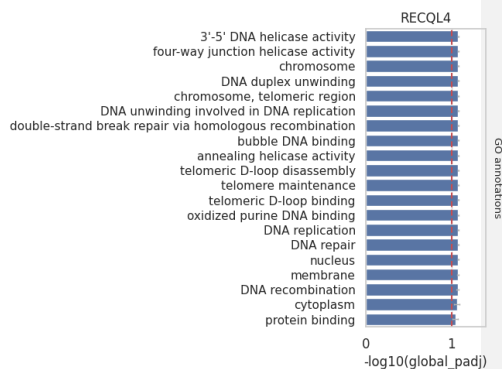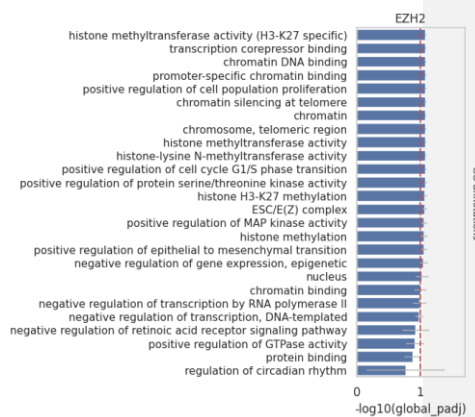

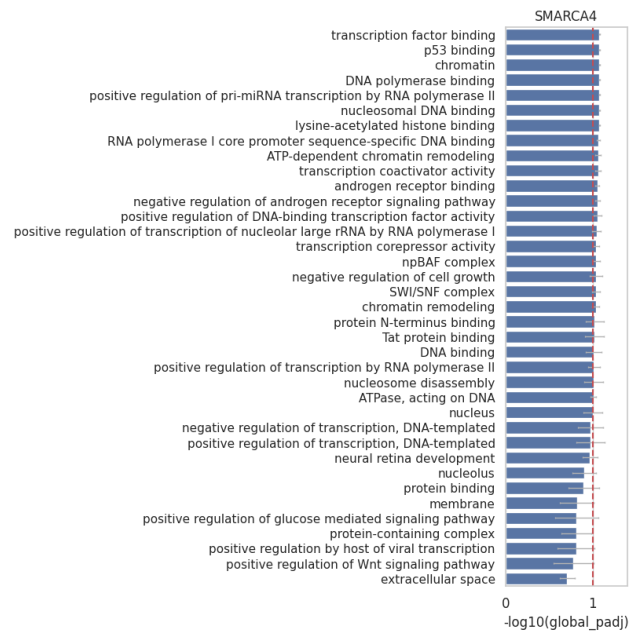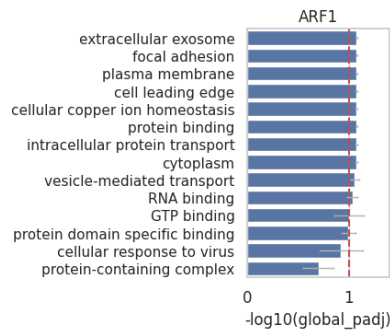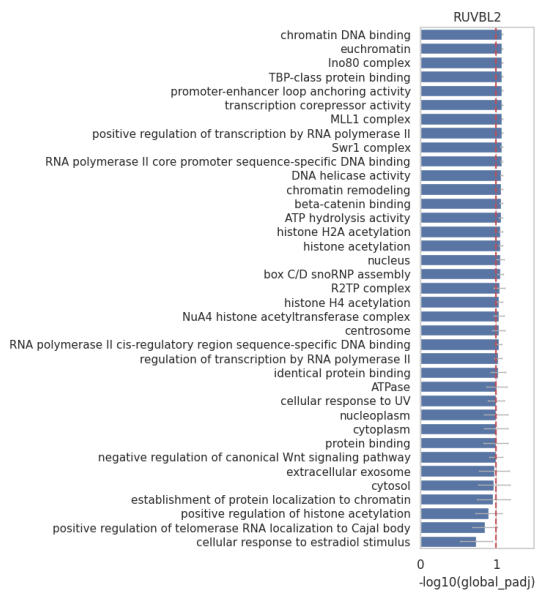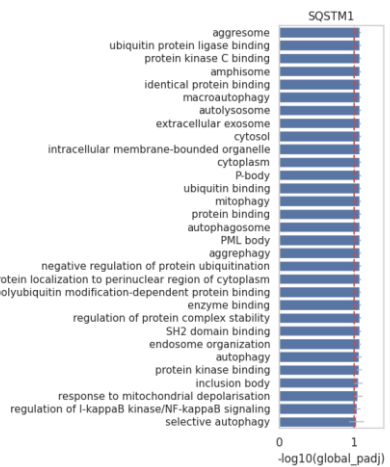

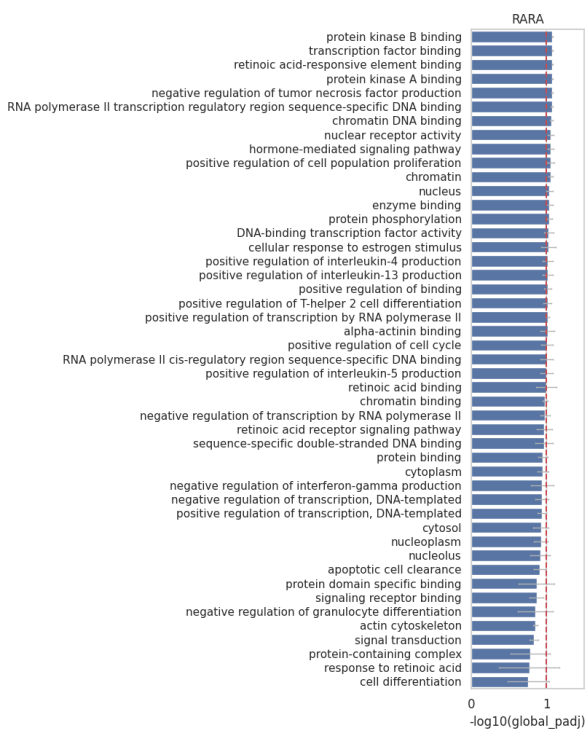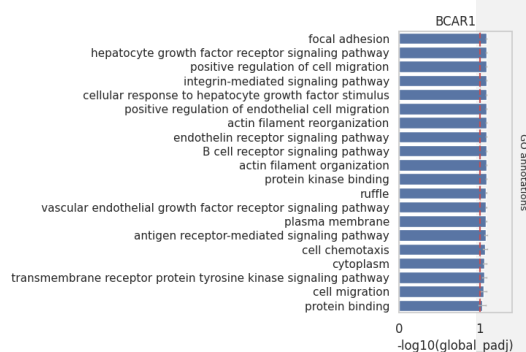

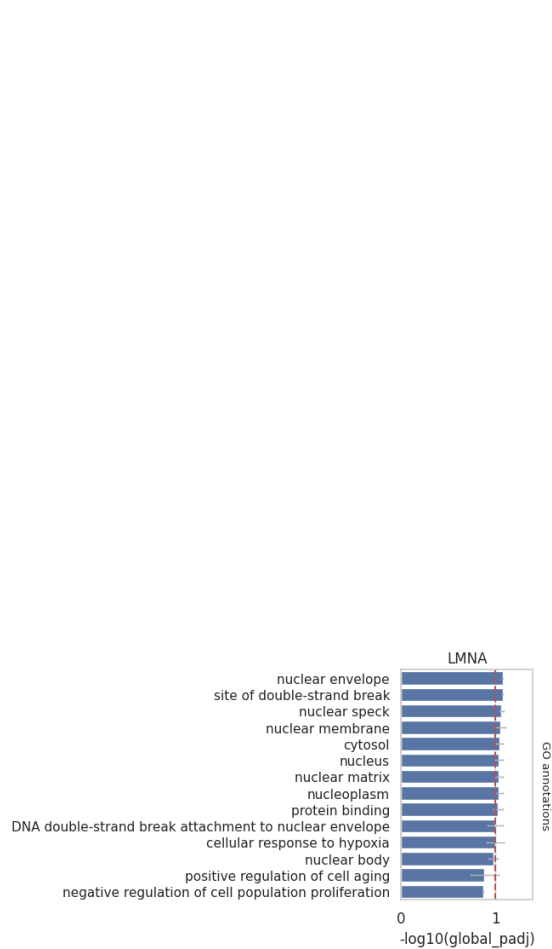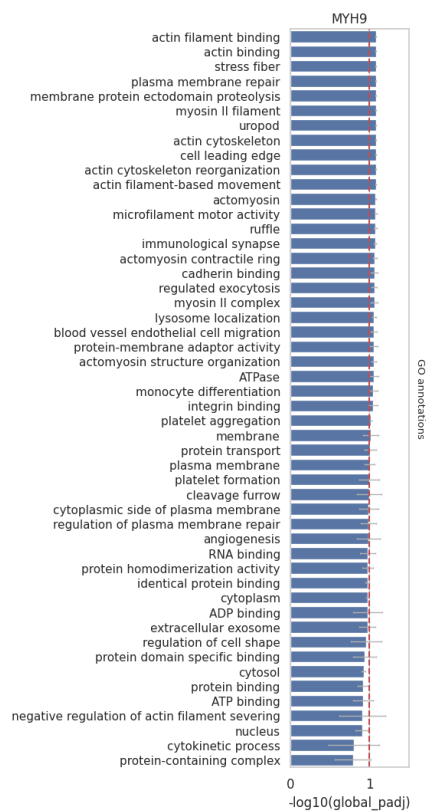

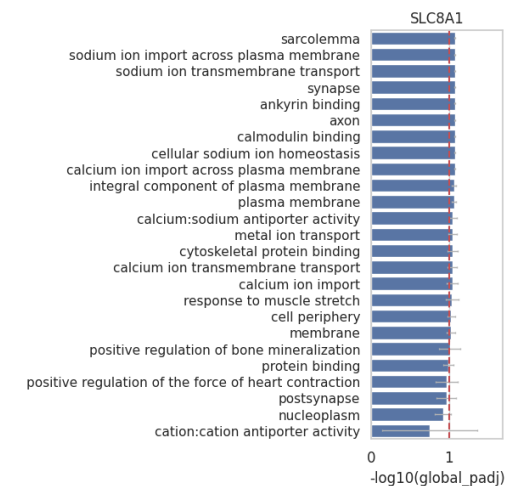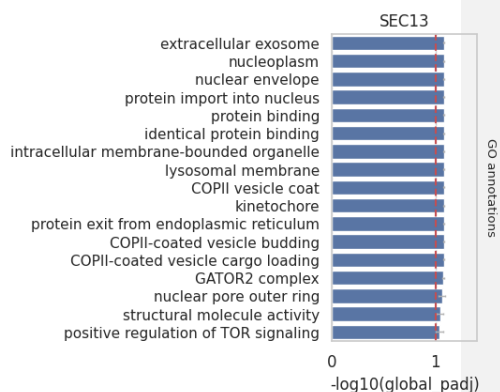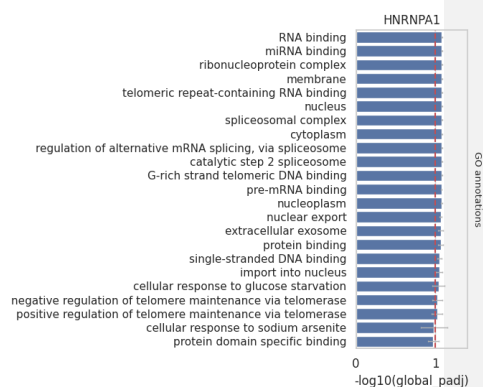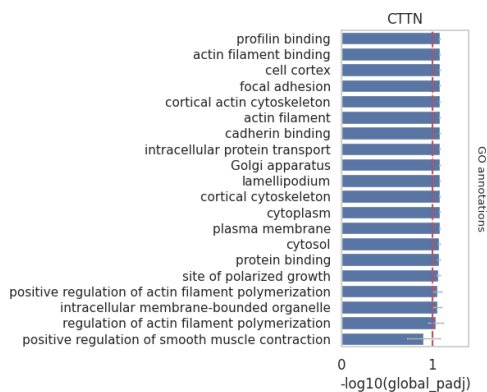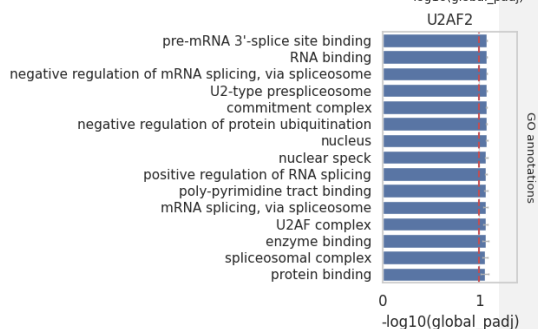

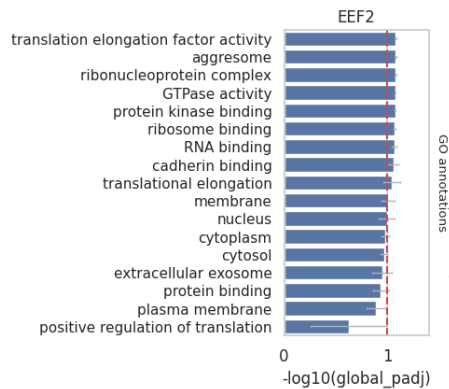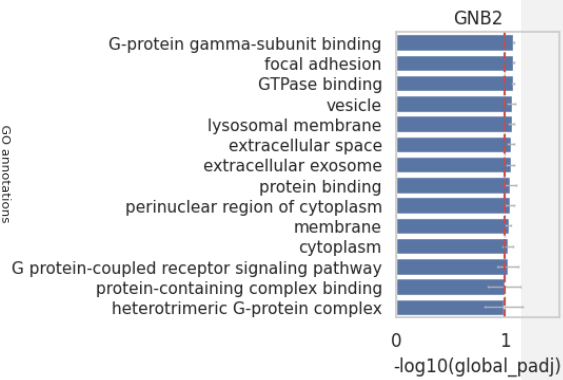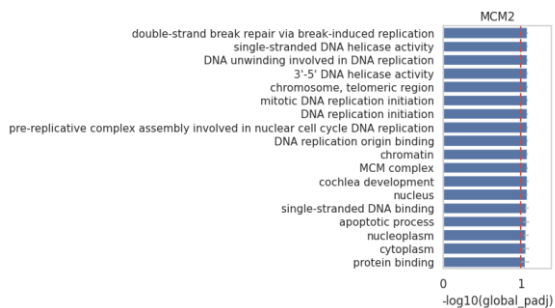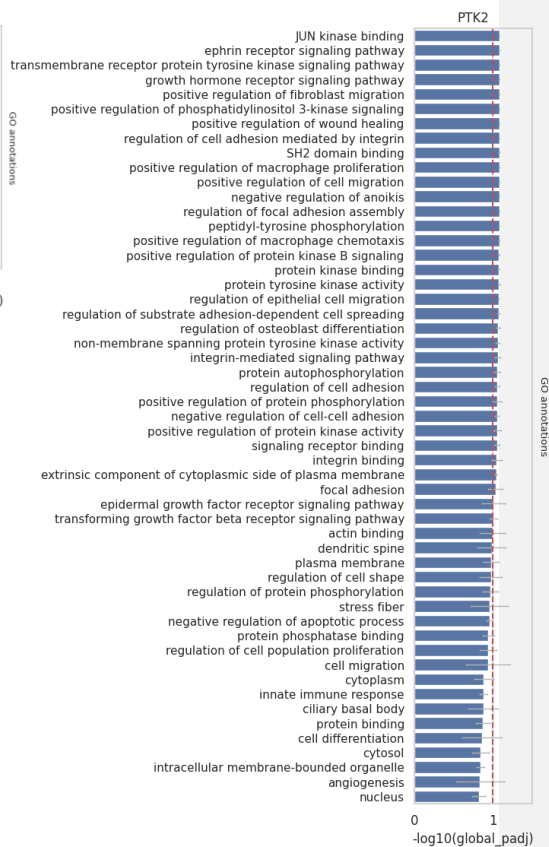

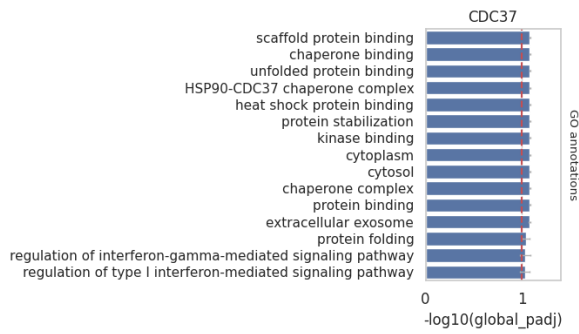

## Non viral Moonlightning genes

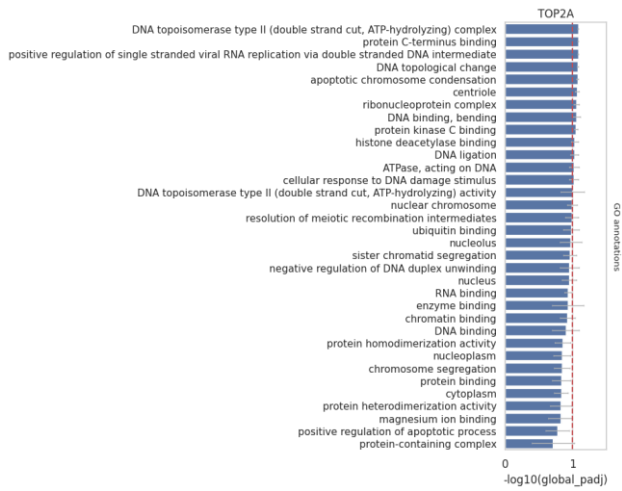



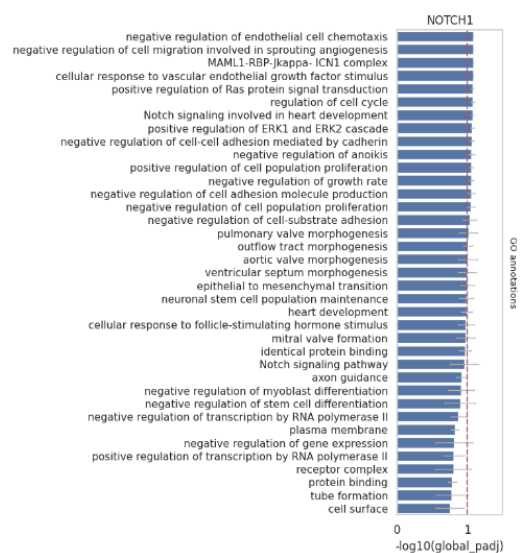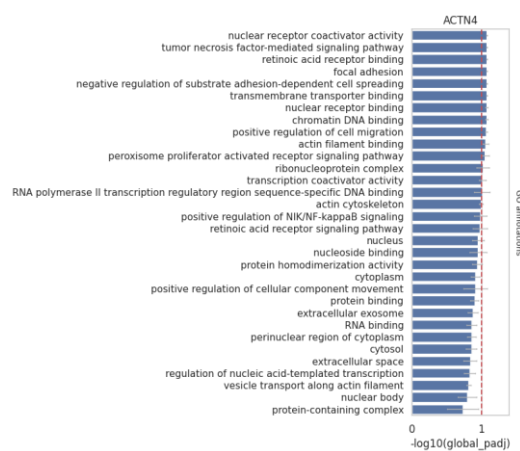

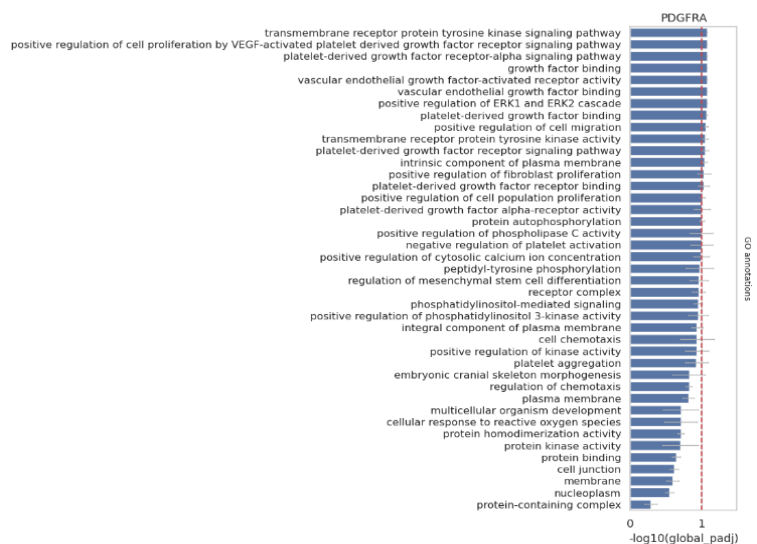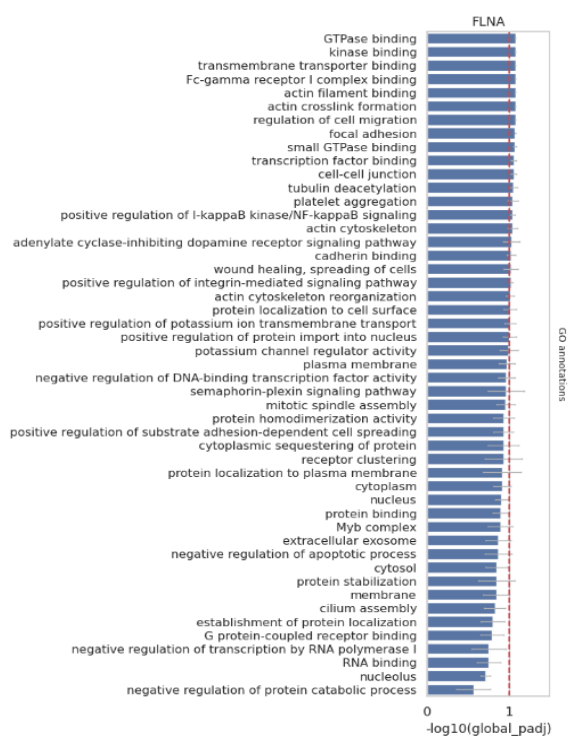

Supplementary Figure 5. Immunome analysis in tumor tissues versus non-tumoral tissues and in TCGA cohort

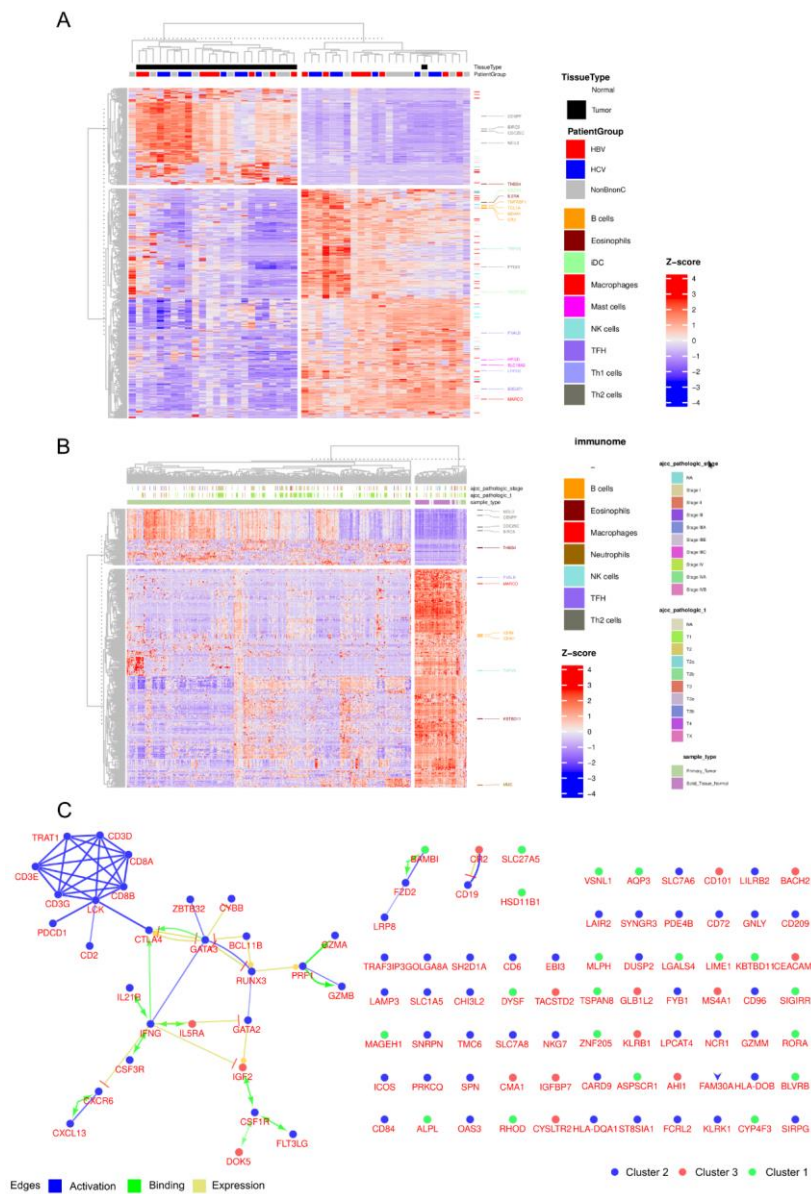

The heatmap with genes differentially expressed in tumors compared to normal tissue samples from Bucuresti cohort (A) and TCGA cohort (B). Data was normalized and hierarchically clustered (Euclidean distance). Z-score spans between -4 (blue) and 4 (red). Immunome markers are highlighted. (A) Fold change >2.5 and adjusted pvalue <0.005. (B) Fold change >3, adjusted pvalue <0.001. (C) CluePedia scores for markers from Cluster 1 (green), Cluster 2 (blue) and Cluster 3 (red). Interactions are based on data from STRING (v11) database. Edges show activation (green), binding (blue), expression (yellow) scores.
